1 THE IL-12– AND IL-23–DEPENDENT NK-CELL RESPONSE IS ESSENTIAL FOR  
2 PROTECTIVE IMMUNITY AGAINST SECONDARY *TOXOPLASMA GONDII*  
3 INFECTION

4 Daria L. Ivanova<sup>1\*</sup>, Tiffany M. Mundhenke<sup>1</sup> and Jason P. Gigley<sup>1\*t</sup>

5 <sup>\*</sup>Department of Molecular Biology, University of Wyoming, Laramie, WY, USA

6

7 Address correspondence and reprint requests to: Dr. Jason P. Gigley, 1000 E. University Ave.  
8 Laramie, WY 82071, USA; email: [jgigley@uwyo.edu](mailto:jgigley@uwyo.edu)

9 ORCID: 0000-0001-8805-4561 (J.P.G.)

10 <sup>t</sup>This work is supported by grants from the American Heart Association AHA

11 17GRNT33700199 and University of Wyoming INBRE P20 GM103432 DRPP awarded to JPG.

12 DLI is a University of Wyoming INBRE P20 GM103432 Graduate Assistantship recipient.

13 T.M.M. is a University of Wyoming INBRE P20 GM103432 supported undergraduate fellow.

14 This project is supported in part by a grant from the National Institute of General Medical  
15 Sciences (2P20GM103432) from the National Institutes of Health. The content is solely the  
16 responsibility of the authors and does not necessarily represent the official views of the National  
17 Institutes of Health

18

19 Abbreviations used in this article: BM, bone marrow; HCMV, human cytomegalovirus; i.g.,  
20 intragastrically; MCMV, murine cytomegalovirus

21 **Abstract**

22

23 Natural Killer (NK) cells can develop memory-like features and contribute to long-term

24 immunity in mice and humans. NK cells are critical for protection against acute *T.*

25 *gondii* infection. However, whether they contribute to long-term immunity in response to this

26 parasite is unknown. We used a vaccine challenge model of parasite infection to address this

27 question and to define the mechanism by which NK cells are activated during secondary parasite

28 infection. We found NK cells were required for control of secondary infection. NK cells

29 increased in number at the infection site, became cytotoxic and produced IFN $\gamma$ . Adoptive transfer

30 and NK-cell fate mapping revealed that *T. gondii*-experienced NK cells were not intrinsically

31 different from naïve NK cells with respect to their long-term persistence and ability to protect.

32 Thus, they did not develop memory-like characteristics. Instead, a cell-extrinsic mechanism may

33 control protective NK-cell responses during secondary infection. To test the involvement of a

34 cell-extrinsic mechanism, we used anti-IL-12p70 and IL-12p35<sup>-/-</sup> mice and found that the

35 secondary NK-cell response was not fully dependent on IL-12. IL-23 depletion with anti-IL-

36 23p19 *in vivo* significantly reduced the secondary NK-cell response, suggesting that both IL-12

37 and IL-23 were involved. Anti-IL-12p40 treatment, which blocks both IL-12 and IL-23,

38 eliminated the protective secondary NK-cell response, supporting this hypothesis. Our results

39 define a previously unknown protective role for NK cells during secondary *T. gondii* infection

40 that is dependent on IL-12 and IL-23.

41 **Introduction**

42  
43         Accumulating studies show that NK cells can acquire features of adaptive immune cells  
44 and develop immunological memory in response to certain stimuli (1). These memory-like NK  
45 cells provide a qualitatively and quantitatively greater response to secondary challenge and are  
46 intrinsically different from naïve cells. Antigen-specific memory NK cells are generated after  
47 encounters with haptens (2) and viruses, such as murine cytomegalovirus (MCMV) and human  
48 cytomegalovirus (HCMV) (3-5). *In vitro* and *in vivo* stimulation with certain cytokines, such as  
49 IL-12, IL-18 and IL-15, leads to the formation of memory-like features in NK cells that are  
50 epigenetically and functionally distinct from naïve cells (6-8). Both antigen specific and  
51 cytokine-activated memory-like NK cells are generated after MCMV infection *in vivo* (9).  
52 Whether NK cells develop memory-like characteristics in response to eukaryotic agents has yet  
53 to be found.

54         *T. gondii* is a food-borne intracellular parasitic protozoan that causes the disease  
55 toxoplasmosis. The parasite is present in one-third of the human population worldwide and is a  
56 significant health concern for immunocompromised individuals (10-13). At present, there is no  
57 vaccine or drug available to prevent or completely cure toxoplasmosis in humans (14, 15). NK  
58 cells are involved in innate immunity during acute *T. gondii* infection and are critical for early  
59 protection (16, 17). They mediate protection *via* IFN $\gamma$  that is secreted in response to IL-12  
60 provided by innate immune cells such as dendritic cells and macrophages (17, 18). NK-cell IFN $\gamma$   
61 also facilitates the differentiation of monocytes into inflammatory macrophages and monocyte-  
62 derived dendritic cells that then serve as the main source of IL-12 (19). In response to systemic  
63 IL-12 production during acute infection, bone marrow NK cells produce IFN $\gamma$  and prime  
64 monocytes for regulatory function (20). NK cells also trigger an adaptive immune cell response

65 to *T. gondii*. In the absence of CD4<sup>+</sup> T cells, IFN $\gamma$  produced by NK cells promotes CD8<sup>+</sup> T-cell  
66 activation (21). In the absence of CD8<sup>+</sup> T cells, NK-cell IFN $\gamma$  contributes to the activation of  
67 CD4<sup>+</sup> T cells (22). In addition to cytokine production, NK cells produce perforin and granzymes  
68 in response to the parasite and its subcellular components (23-26).

69 NK cells are clearly important for early control of *T. gondii* infection, yet their role in  
70 long-term immunity has not been addressed. This is clinically important to understand because  
71 there currently is no vaccine that elicits sterilizing immunity to the parasite (15, 27). A vaccine  
72 targeting the stimulation of NK cells in addition to CD8<sup>+</sup> T cells could therefore be more  
73 beneficial long-term. In addition, *T. gondii* infection causes health complications in  
74 immunodeficient patients, many of whom are T-cell deficient (e.g., HIV patients) (11).  
75 Discovering new ways to utilize NK cells could be therapeutically beneficial for these patients.

76 In this study, we aimed to find whether NK cells contribute to long-term immunity  
77 against *T. gondii* in a vaccine challenge setting. We also investigated whether NK cells  
78 developed memory-like features in response to this vaccination. Lastly, we tested mechanisms  
79 involved in the activation of NK cells during secondary challenge. We demonstrate that NK cells  
80 are critical for reducing parasite burdens after lethal challenge. *T. gondii* infection induces a  
81 similar Th1 cytokine milieu as compared to MCMV, however, unlike memory-like NK cells  
82 generated by viral infection and cytokine stimulation (3, 9, 28), *T. gondii*-experienced NK cells  
83 did not intrinsically develop memory-like traits. This highlights for the first time that, NK cells  
84 are required for control of *T. gondii* reinfection, but are activated in this capacity by cell extrinsic  
85 mechanisms. Our exploration of the mechanisms involved in this secondary NK cell response  
86 revealed that their response to reinfection is dependent upon both IL-12p70 and IL-23. Our

87 results reveal a novel role for NK cells during secondary *T. gondii* challenge infection in the  
88 presence of memory T cells that is dependent on IL-12 family cytokine stimulation.

89

## 90 **Materials and methods**

91

### 92 *Mice*

93

94 C57BL/6 (B6), CBA, B6.129S7-*Rag1*<sup>tm1Mom</sup> (*Rag1*<sup>-/-</sup>, Rag1 knockout [KO]), B6.129S1-*Il12a*<sup>tm1Jm</sup>  
95 (IL-12p35 KO), B6.129S1-*Il12*<sup>tm1Jm</sup>/J (IL-12p40 KO) and B6.129X1-*Gt(ROSA)26Sor*<sup>tm1(EYFP)Cos</sup>  
96 (R26R-EYFP) mice were purchased from The Jackson Laboratory. B10;B6-*Rag2*<sup>tm1Fwa</sup> *Il2rg*<sup>tm1Wjl</sup>  
97 (*Rag2*<sup>-/-</sup>*γc*<sup>-/-</sup>) mice were purchased from TACONIC. Transgenic NKp46-CreERT2 mice were  
98 kindly provided by Dr. Lewis Lanier (UCSF, CA) and crossed onto ROSA26R-EYFP mice to  
99 create inducible reporter mice for fate mapping. All animals were housed under specific  
100 pathogen-free conditions at the University of Wyoming Animal Facility.

101

### 102 *Ethics Statement*

103

104 This study was carried out in strict accordance following the recommendations in the Guide for  
105 the Care and Use of Laboratory Animals of the National Institutes of Health. The University of  
106 Wyoming Institutional Animal Care and Use Committee (IACUC) (PHS/NIH/OLAW assurance  
107 number: A3216-01) approved all animal protocols.

108

109 *T. gondii* parasites and infection

110

111 Tachyzoites of RH and RH $\Delta$ *cps1-1* (CPS) (kindly provided by Dr. David Bzik, Dartmouth  
112 College, NH) were cultured by serial passage in human fetal lung fibroblast (MRC5, ATCC)  
113 cell monolayers in complete DMEM (supplemented with 0.2 mM uracil for CPS strain). For  
114 mouse infections, parasites were purified by filtration through a 3.0- $\mu$ m filter (Merck Millipore  
115 Ltd.) and washed with phosphate-buffered saline (PBS). Mice were infected intraperitoneally  
116 (i.p.) with  $1 \times 10^3$  or  $1 \times 10^6$  RH tachyzoites or  $1 \times 10^6$  CPS tachyzoites. The brains of CBA  
117 mice 5 wk after ME49 infection were used as a source of ME49 cysts. Mice were infected i.p. or  
118 i.g. (intragastrically) with 10 or 100 ME49 cysts.

119

#### 120 *Cell depletion and fate mapping*

121

122 To deplete NK cells, B6 mice were treated i.p. with 200  $\mu$ g of anti-NK1.1 (PK136, Bio X Cell) 1  
123 d before infection (d -1), on the day of infection (d 0) and every other day after infection for a  
124 maximum of 3 wk. To deplete CD8<sup>+</sup> or CD4<sup>+</sup> T cells, mice were treated i.p. with 200  $\mu$ g of  
125 anti-CD8 T (2.43, Bio X Cell) or anti-CD4 T (GK1.5, Bio X Cell), respectively on d -1 and 0.  
126 To neutralize IL-12 family cytokines, mice were treated i.p. with 200  $\mu$ g of anti-IL-12p70 (R2-  
127 9A5, Bio X Cell), anti-IL-12p40 (C17.8, Bio X Cell) and anti-IL-23p19 (MMp19B2, Biolegend)  
128 on d -1, 0 and 2. To block DNAM-1, mice were treated i.p. with 100  $\mu$ g of anti-DNAM1 (480.1,  
129 Biolegend) on d -1 and 0. To induce yellow fluorescent protein (YFP) expression on NKp46<sup>+</sup>  
130 cells, NKp46-CreERT2<sup>+/-</sup>  $\times$  R26R-EYFP<sup>+/+</sup> mice were treated i.g. with 3.75 mg (males) and 2.5  
131 mg (females) of tamoxifen (Sigma) for five consecutive days, beginning on the day of CPS  
132 immunization.

133

134 *Flow cytometry*

135

136 Single-cell suspensions of peritoneal exudate cells (PECs), spleen and bone marrow (BM) were  
137 harvested from mice. Cells were then plated at  $0.5\text{--}1.5 \times 10^6$  cells/well. For surface staining,  
138 cells were washed twice with PBS and stained for viability in PBS using Fixable Live/Dead  
139 Aqua (Invitrogen) for 30 min. After the cells were washed with PBS, surface staining was  
140 performed using antibodies diluted in stain wash buffer (2% fetal bovine serum in PBS and [2  
141 mM] EDTA) for 25 min on ice. For functional NK-cell assays, cells were stimulated for 4 h with  
142 plate bound anti-NK1.1 in the presence of  $1\times$  protein transport inhibitor cocktail (PTIC)  
143 containing Brefeldin A/Monensin (eBioscience, Thermo Fisher Scientific) and anti-CD107a  
144 (eBio1D4B, eBioscience, Thermo Fisher Scientific) in complete Iscove's DMEM medium  
145 (Corning). After fixable live/dead and surface staining, the cells were fixed and permeabilized  
146 for 1 h on ice in Fixation/Permeabilization solution (BD Bioscience), followed by intracellular  
147 staining in  $1\times$  permeabilization wash buffer (BD Bioscience) with anti-IFN $\gamma$  (XMG1.2,  
148 eBioscience, Thermo Fisher Scientific) for 40 min. Additional cells were surface stained with  
149 antibodies from Biolegend against CD3 (17A2), CD49b (DX5), NKp46 (29A1.4), NK1.1, CD4  
150 (RM4-5), CD8b (YTS156.7.7), CD11b (M1/70), CD27 (LG.3A10), KLRG1 (2F1/KLRG1) and  
151 DNAM-1 (10E5); antibodies from eBioscience (Thermo Fisher Scientific) against Ly49I (YLI-  
152 90), Ly49H (3D10), CD94 (18d3) and CD107a (1D4B) and an antibody from BD Biosciences  
153 against Ly49D (4E5). The cells were washed twice with  $1\times$  PBS and resuspended in  $1\times$  PBS and  
154 analyzed using Guava easyCyte 12HT flow cytometer (Millipore) and FlowJo software (Tree  
155 Star).

156

157 *Adoptive transfer*

158

159 Spleens were harvested from B6 mice 5 wk after immunization with CPS, from mice 5 wk after  
160 an initial immunization followed by a second immunization at wk 2 (2×CPS) and from naïve  
161 mice, and NK cells were purified by negative selection using EasySep Mouse NK Cell Isolation  
162 Kit (STEMCELL TECHNOLOGIES). Normalized NK-cell numbers ( $1-3 \times 10^6$ ) were injected  
163 intravenously (i.v.) into *Rag2<sup>-/-</sup>γc<sup>-/-</sup>* or into naïve B6 mice. Recipient *Rag2<sup>-/-</sup>γc<sup>-/-</sup>* mice were  
164 infected with  $1 \times 10^3$  tach. RH i.p. or 10 ME49 cysts i.g. for the survival assessment. Recipient  
165 B6 mice were infected with  $1 \times 10^5$  tach. RH i.p. or 10 ME49 cysts i.p., and organs were  
166 harvested at 4 d after RH and 5 wk after ME49 infection for the parasite burden assessment.

167

168 *Parasite burden assessment with real-time PCR*

169

170 DNA was extracted from the entire PEC and spleen sample harvested from infected mice using a  
171 DNeasy Blood & Tissue Kit (Qiagen). Parasite DNA from 600 ng of PEC DNA and 800 ng of  
172 splenic tissue DNA was amplified using primers specific for the *T. gondii* B1 gene (forward  
173 primer 5'-GGAAGTGCATCCGTTTCATG-3' and reverse primer 5'-  
174 TCTTTAAAGCGTTCGTGGTC-3') at 10 pmol of each per reaction (Integrated DNA  
175 Technologies) by real-time fluorogenic PCR using SsoAdvanced Universal IT SYBR Green SMx  
176 (BIO-RAD) on a CFX Connect Real-Time System cycler (BIO-RAD). Parasite equivalents were  
177 determined by extrapolation from a standard curve amplified from purified RH parasite DNA.

178



179 *Statistical analysis*

180

181 Statistical analysis was performed using Prism 7.0d (GraphPad) and Microsoft Excel 2011.

182 Significant differences were calculated using either unpaired Student's t-test with Welch's

183 correction or analysis of variance (ANOVA). The log-rank (Mantel-Cox) test was used to

184 evaluate survival rate. Data is presented in graphs as the mean± standard deviation (SD).

185 Significance is denoted as follows: ns, not significant ( $p > 0.05$ ) or significant with a p-value less

186 than 0.05 .

187

## 188 **Results**

189

190 *NK cells are required for protection during secondary T. gondii infection*

191

192 NK cells have been shown in several infection models to develop memory-like

193 characteristics, including the ability to contribute to protection against secondary challenge of

194 infection (3, 29-31). NK cells are critical for protection during acute *T. gondii* infection (16);

195 however, whether they can also contribute to secondary infection by this parasite in the presence

196 of T-cell memory is not known. A previously published report suggested that NK1.1+ and

197 ASGM1+ cells helped provide immunity against *T. gondii* reinfection in the absence of CD8+ T

198 cells (32). Therefore, we used a vaccine challenge model to test whether NK cells also helped

199 provide immunity against *T. gondii* in the presence of memory T cells. For the primary infection,

200 B6 mice were infected i.p. with tachyzoites of live attenuated uracil auxotroph strain CPS. These

201 parasites are able to invade cells *in vivo* but do not replicate in the absence of uracil and get

202 cleared within a week (33). Infection with this vaccine strain induces localized inflammation and  
203 leads to the generation of memory CD8<sup>+</sup> T cells that protect mice against lethal reinfections  
204 regardless of the infecting strain or route of infection (34, 35). Five to 6 wk after CPS  
205 immunization, mice were challenged i.p. with lethal doses of highly virulent type I RH  
206 tachyzoites. To determine if NK cells were important during this secondary challenge, NK cells  
207 were depleted using anti-NK1.1 upon reinfection, and parasite burdens were measured by semi-  
208 quantitative real-time PCR for the *T. gondii*-specific B1 gene. As shown in Figure 1A, parasite  
209 burdens were significantly higher in NK cell-depleted mice as compared with the controls. To  
210 investigate the importance of NK cells during secondary challenge with type II ME49 parasites  
211 and the long-term infection, CPS-immunized mice were orally challenged with the type II ME49  
212 strain and treated with anti-NK1.1 for 3 wk. Mouse cyst burden and survival were assayed at 5  
213 wk after infection. The cyst counts in the brain clearly showed elevated cyst numbers in anti-  
214 NK1.1-treated mice as compared with undepleted controls (Fig. 1B). These data indicate that  
215 NK cells play a protective role in secondary infections after vaccination and in the presence of T-  
216 cell memory during type I (RH) and type II (ME49) *T. gondii* infection.

217

218 *NK cells become activated during an adaptive recall response*

219

220 We showed in Figure 1 that, after vaccination and in the presence of memory T cells, NK  
221 cells contributed to the control of a challenge infection. How the NK cells were responding to the  
222 secondary infection was not, however, known. Therefore, we next determined whether NK cells  
223 were activated during secondary challenge and defined how they responded. We measured NK-  
224 cell frequency, number and functionality in the peritoneum, the site of infection, and in the

225 spleen by flow cytometry. B6 mice were infected with CPS i.p. and 5 to 6 wk later were  
226 challenged i.p. with type I RH parasites. NK1.1+CD3<sup>-</sup> lymphocytes, which included NK cells  
227 and other innate lymphoid cells (ILCs) that express the NK1.1 receptor, increased in frequency  
228 and number at the infection site as early as 1 d after reinfection, remained there through d 5 and  
229 gradually declined by d 10 (Fig. 2A, 2B and 2C). Over the course of the secondary infection,  
230 NK1.1+CD3<sup>-</sup> cells constituted a large proportion of the lymphocytes with frequencies and  
231 numbers comparable to those of CD8<sup>+</sup> T cells (Fig. 2B, 2C). To differentiate between NK cells  
232 and other NK1.1<sup>+</sup> ILCs, NK cells were further defined as CD49b+NKp46<sup>+</sup> cells (gated on  
233 CD3<sup>-</sup> live lymphocytes) (Fig. 2D). Only CD49b+NKp46<sup>+</sup> cells increased in frequency and  
234 number at the site of reinfection, suggesting that ILC1 (CD49b<sup>-</sup>NKp46<sup>+</sup>) did not mount a  
235 secondary response (Fig. 2D, 2E). NK cells did not increase in the spleen after challenge,  
236 suggesting that the secondary NK-cell response was localized to the site of infection  
237 (Supplemental Fig. 1A, 1B). In the peritoneum, the NK-cell increase in frequency and number  
238 after secondary infection was similar to that which occurred during primary infection  
239 (Supplemental Fig. 1C).

240         The main function provided by NK cells during acute *T. gondii* infection is IFN $\gamma$   
241 production, which is critical for protection (16, 36). To assess how NK cells were responding, we  
242 measured their IFN $\gamma$  production. NK cells produced IFN $\gamma$  during secondary infection, and the  
243 frequency and number of IFN $\gamma$ <sup>+</sup> NK cells increased at the site of infection (Fig. 2F, 2G and  
244 Supplemental Fig. 1D). In addition to the cytokine production, NK cells develop a cytotoxic  
245 response after stimulation with *T. gondii* parasites and their subcellular components (23, 25). We  
246 measured NK-cell cytotoxicity during secondary challenge using the surrogate marker CD107a  
247 (37). The frequency of cytotoxic CD107a<sup>+</sup> NK cells did not significantly change, whereas their

248 absolute cell numbers increased (Fig. 2F, 2H and Supplemental Fig. 1D). NK cells also  
249 developed a polyfunctional response (CD107a+IFN $\gamma$ +), which was significantly increased during  
250 secondary challenge (Fig. 2F, 2I and Supplemental Fig. 1D). These findings indicate that NK  
251 cells become rapidly activated during the response to secondary *T. gondii* infection to provide  
252 effector functions constituting a substantial portion of the total lymphocytes during a recall  
253 response.

254

255 *Multiple NK-cell subpopulations are activated during secondary T. gondii infection*

256

257 Inflammatory cytokines and/or activating receptor engagement with cognate ligands can  
258 activate NK cells (38, 39). After MCMV infection, both cytokine-activated and ligand-driven  
259 NK-cell responses occur (9). During some viral infections, specific NK-cell subpopulations,  
260 defined by their receptor expression, dominate the response (40, 41). During acute *T. gondii*  
261 infection, we and others have not observed a dominant responding NK-cell population,  
262 suggesting that NK cells are driven by a cytokine-dependent process, rather than by a process  
263 that depends on activating receptor ligands (22, 42). To further define how NK cells were  
264 responding to secondary *T. gondii* infection, we measured whether a dominant NK-cell  
265 population developed in the context of immune memory to the parasite. Mice were immunized  
266 with CPS and 5 to 6 wk later were infected with type I RH. The expression of inhibitory  
267 receptors, including Ly49I and CD94, and activating receptors, including Ly49H and Ly49D,  
268 was assessed on the total NK-cell population as well as on IFN $\gamma$ + NK cells by flow cytometry.  
269 Total and IFN $\gamma$ + NK cells were similarly distributed within the subsets of lymphocytes most of  
270 which showed the expected activation in the RH-infected mice relative to the CPS-only mice,

271 and there was no dominant population observed after reinfection (Fig. 3A, 3B). Interestingly, the  
272 fold increase in the CD94<sup>+</sup> subset was higher than that of Ly49I<sup>+</sup>, Ly49H<sup>+</sup> and Ly49D<sup>+</sup> NK  
273 cells.

274 As NK cells stochastically express an array of receptors, the dominant NK-cell  
275 population might express multiple receptors rather than a single receptor. We therefore next  
276 analyzed the phenotype of NK cells expressing combinations of NK-cell receptors in CPS-  
277 immunized mice compared with mice that were immunized with CPS and later challenged with  
278 RH 3 d before analysis. Among the total NK cells and IFN $\gamma$ <sup>+</sup> NK cells, we observed a significant  
279 decrease in the frequency of CD94<sup>-</sup>Ly49I<sup>-</sup>Ly49H<sup>-</sup>Ly49D<sup>-</sup> NK cells in the RH-challenged mice  
280 (Fig. 3C, 3D). This reduction of the receptor-negative NK cells was associated with an increase  
281 in NK cells that expressed multiple combinations of the receptors and that were widely  
282 distributed. Interestingly, the combinations that included CD94 receptor had the greatest increase  
283 in frequency (Fig. 3D). This included NK cells that were CD94<sup>+</sup>Ly49I<sup>-</sup>Ly49H<sup>-</sup>Ly49D<sup>-</sup>.  
284 Nevertheless, compared with viral infections, a distinct, dominant responding NK-cell  
285 population did not stand out during secondary *T. gondii* infection, similar to our observations  
286 during acute *T. gondii* infection.

287

288 *Activated NK cells during secondary T. gondii infection are mature*

289

290 MCMV-primed Ly49H<sup>+</sup> and alloantigen-primed Ly49D<sup>+</sup> ligand-driven NK-cell subsets  
291 that develop intrinsic memory develop a mature phenotype marked by being  
292 CD11b<sup>+</sup>CD27<sup>-</sup>KLRG1<sup>high</sup>DNAM-1<sup>low</sup> on their surface (3, 43, 44). Maturation of NK cells then  
293 seems to be critical for their ability to acquire features of adaptive immune cells. Therefore,

294 measuring whether NK cell maturation was altered during secondary challenge after vaccination  
295 is important to better understand NK-cell biology in this setting. We next defined how  
296 vaccination and the presence of immune memory impacted NK-cell maturation after secondary  
297 *T. gondii* infection. As NK cells mature in the periphery, they progress from the least mature  
298 stage, R0 (CD27<sup>-</sup>CD11b<sup>-</sup>); to stage R1 (CD27<sup>+</sup>CD11b<sup>-</sup>); followed by stage R2  
299 (CD27<sup>+</sup>CD11b<sup>+</sup>) and the terminally mature stage, R3 (CD27<sup>-</sup>CD11b<sup>+</sup>) (45). Mice were  
300 immunized with CPS as described above, and NK-cell maturation was measured at the site of  
301 reinfection based on expression of CD27 and CD11b. RH infection of CPS-vaccinated animals  
302 significantly elevated NK-cell maturation to stage R2 (Fig. 4A). This was even more evident  
303 when we measured NK cell maturation (CD27<sup>-</sup>CD11b<sup>+</sup>) in IFN $\gamma$ <sup>+</sup> NK-cell populations (Fig.  
304 4B). Immature NK cells (CD27<sup>-</sup>CD11b<sup>-</sup>, R0) decreased, intermediately mature NK cells  
305 (CD27<sup>+</sup>CD11b<sup>+</sup>, R2) increased and other subsets (R1, CD27<sup>+</sup>CD11b<sup>+</sup> and R3, CD27<sup>-</sup>CD11b<sup>+</sup>)  
306 did not change after secondary infection.

307 In addition to conventional maturation markers, we also measured expression of the NK-  
308 cell activation marker KLRG1 and the costimulatory molecule DNAM-1. Adaptive NK cells  
309 have high KLRG1 and low DNAM-1 expression after MCMV and alloantigen stimulation (3, 43,  
310 44). NK cells from CPS-immunized and naïve mice did not significantly differ in the expression  
311 of these markers (data not shown). There was a significant increase in KLRG1<sup>+</sup> and DNAM-1<sup>+</sup>  
312 subsets after reinfection (Fig. 4C-F). By measuring the expression of these markers in  
313 combination with each other, we found that NK cells of the memory cell phenotype  
314 (KLRG1<sup>high</sup>DNAM-1<sup>low</sup>CD11b<sup>+</sup>CD27<sup>-</sup>) did not significantly change and constituted a small  
315 portion of the total and IFN $\gamma$ <sup>+</sup> NK cells before and after reinfection (Fig. 4G, 4H). The  
316 population that increased and produced the most IFN $\gamma$  was KLRG1<sup>+</sup>DNAM-1<sup>+</sup>CD11b<sup>+</sup>CD27<sup>-</sup>,

317 followed by KLRG1+DNAM-1+CD11b+CD27+. IFN $\gamma$  was mainly produced by mature DNAM-  
318 1+ rather than mature DNAM-1- NK cells (Fig. 4H). This suggested that DNAM-1 could be  
319 involved in NK-cell responses to secondary *T. gondii* infection.

320 We addressed this possibility by blocking DNAM-1 signaling *in vivo* using anti-DNAM-  
321 1 in CPS-immunized and RH-challenged mice. Anti-DNAM-1 treatment appeared to possibly  
322 deplete DNAM-1<sup>high</sup> NK cells, however, treatment did not result in a reduction of total NK cell  
323 and IFN $\gamma$ -producing NK cell frequency or number or frequency (Supplemental Fig. 2 A,B and  
324 C). Based on this result, treatment most likely did not deplete DNAM-1<sup>high</sup> cells and simply  
325 blocked the receptor resulting in decreased staining *ex vivo* (Supplemental Fig. 2C). In summary,  
326 there does not appear to be a specific NK-cell subpopulation that develops in response to *T.*  
327 *gondii* vaccination.

328

329 *T. gondii*-experienced and naïve NK cells are not intrinsically different

330

331 Accumulating studies indicate that NK cells can further differentiate after primary  
332 stimulation (cytokine stimulation, hapten exposure or viral infection) to acquire features of  
333 adaptive immune cells and develop memory-like abilities in a cell-intrinsic manner (2, 3, 31).  
334 However, the development of cell-intrinsic NK-cell memory-like features in response to  
335 eukaryotic pathogens has yet to be discovered. To address whether *T. gondii*  
336 infection-experienced NK cells were intrinsically different from naïve cells (without parasite  
337 experience) in their ability to protect against secondary infection, we used T and B cell-deficient  
338 *Rag1*<sup>-/-</sup> mice (46). One group of *Rag1*<sup>-/-</sup> mice were immunized with CPS parasites, whereas a  
339 second was not. Both groups were challenge infected with type I RH (i.p.) or type II ME49 cysts

340 (i.p. and i.g.) 5 to 6 wk later, and their survival was monitored CPS-immunized *Rag1*<sup>-/-</sup> mice  
341 were not protected better than non-immunized controls (Fig. 5A-C). The administration of the  
342 parasites *via* different routes also did not affect this result (Fig. 5B, C).

343 NK cells do not express RAG recombinase once they begin to develop (47). However, in  
344 *Rag1*<sup>-/-</sup> mice there is impaired NK-cell expansion and differentiation of memory-like  
345 characteristics after MCMV infection (48). One reason we may not have observed a survival  
346 difference between CPS-immunized *Rag1*<sup>-/-</sup> and non-immunized *Rag1*<sup>-/-</sup> mice could be due to the  
347 RAG1 deficiency and a consequent loss of the development of CPS immunization–induced NK  
348 cell–intrinsic memory-like features. Therefore, to further test whether cell-intrinsic differences  
349 existed between naïve and CPS-experienced NK cells, we performed NK-cell adoptive transfer  
350 into *Rag2*<sup>-/-</sup>*γc*<sup>-/-</sup> mice, which lack T, B and NK cells (49). Wild-type (WT) B6 animals were  
351 immunized with CPS parasites or were not immunized. Bulk NK cells were purified by negative  
352 selection from the spleens of 5-wk CPS-immunized mice or non-immunized age-matched  
353 controls. NK cells were transferred i.v. into the *Rag2*<sup>-/-</sup>*γc*<sup>-/-</sup> recipient mice. Those mice were then  
354 challenged with type II ME49 cysts, and their survival was measured. As in immunized *Rag1*<sup>-/-</sup>  
355 animals, *Rag2*<sup>-/-</sup>*γc*<sup>-/-</sup> recipients of CPS-experienced NK cells did not survive any longer than did  
356 recipients of naïve NK cells (Fig. 5D). This result indicated that *T. gondii*–experienced NK cells  
357 were not intrinsically different in their ability to protect immunodeficient mice as compared with  
358 naïve NK cells.

359 In *Rag2*<sup>-/-</sup>*γc*<sup>-/-</sup> mice, adoptively transferred NK cells undergo homeostatic proliferation,  
360 resulting in their spontaneous activation and production of IFN $\gamma$  (50). This could have been why  
361 we could not detect a cell-intrinsic difference between *T. gondii*–experienced and naïve NK  
362 cells. Therefore, to limit homeostatic proliferation-associated cell activation, WT mice were used



363 as recipients of CPS-experienced and naïve NK cells to see if parasite-experienced NK cells  
364 were more protective. Purified NK cells from the spleens of CPS-immunized or naïve B6 mice  
365 were transferred into WT recipients. Recipient animals were then challenged with either type I  
366 RH parasites or type II ME49 cysts. The parasite burdens were measured by real-time PCR for  
367 the parasite-specific B1 gene at 4 d after RH and by brain cyst counts 5 wk after ME49 infection.  
368 We did not observe any significant differences in parasite burdens between the recipients of  
369 CPS-immunized and naïve NK cells (Supplemental Fig. 3A, 3B).

370 In addition to conveying more-efficient protection in response to secondary challenge  
371 with the same stimuli, memory lymphocytes develop the ability to persist longer than naïve cells  
372 (31). For the above adoptive transfer experiments, NK cells were purified from B6 mice 5 wk  
373 after immunization. These bulk NK cells contained cells that had experienced primary *T. gondii*  
374 infection as well as newly generated naïve cells. To differentiate between long-lived and naïve  
375 NK cells and to assess their ability to persist, the tamoxifen-inducible reporter strain NKp46-  
376 CreERT2 × Rosa26-YFP was used to fate map NK cells activated during immunization and not  
377 newly generated NK cells (9). To label and track whether NK cells were long-lived after *T.*  
378 *gondii* infection, reporter mice were immunized with CPS and at the same time treated with  
379 tamoxifen. Tamoxifen treatment was continued for five consecutive days after immunization,  
380 and mice were harvested 5 wk later. Control reporter mice that were not immunized with CPS  
381 were treated with tamoxifen for 5 d and harvested 5 wk later. The flow cytometry analysis  
382 revealed that the frequency and number of YFP+ NK cells, which represented long-lived  
383 persistent cells, was not different between CPS-immunized and naïve mice in the peritoneum  
384 (the site of infection) (Fig. 6A), spleen (periphery) (Fig. 6B) and the bone marrow (the site of  
385 NK-cell generation) (Fig. 6C). Interestingly, there was a trend toward a reduction in the

386 frequency of YFP+ NK cells in immunized mice as compared with naïve mice. Taken together,  
387 these results indicate that *T. gondii*-experienced and naïve murine NK cells are not intrinsically  
388 different in their ability to protect against or persist after *T. gondii* infection.

389

390 *NK cells get activated independently of T cells*

391

392 Intrinsic NK-cell memory does not develop in all disease situations (51). NK cells can  
393 still contribute to adaptive immune recall responses even if they are not intrinsically different  
394 from naïve cells. Studies suggest that antigen-specific CD4+ T cells rapidly produce IL-2 and  
395 can activate NK cells (51-54). We found that NK cells responded to secondary *T. gondii*  
396 infection, but they were not intrinsically different from naïve NK cells. Therefore, we next  
397 examined whether memory CD4+ or CD8+ T cells were required for helping to activate NK cells  
398 in response to secondary *T. gondii* infection. To test the role of CD4+ and CD8+ T cells in NK-  
399 cell activation, mice were immunized with CPS and 5 to 6 wk later depleted of CD4+ or CD8+ T  
400 cells. Depleted and non-depleted animals were then challenged with RH, and NK-cell responses  
401 were measured at the site of infection. NK cells increased in frequency and number and produced  
402 IFN $\gamma$  even when CD4+ or CD8+ T cells were absent (Fig. 7). Interestingly, after the treatment  
403 with anti-CD4, NK cells produced more IFN $\gamma$  than non-treated mice. This could be explained by  
404 a concurrent depletion of CD4+ Treg cells by the antibody (55). Overall, the above result showed  
405 that, in contrast to other infection models in which NK-cell responses depended on antigen-  
406 specific T cells, CD4+ and CD8+ T cells were not required for NK-cell activation during  
407 secondary *T. gondii* infection.

408

409 *IL-12 and IL-23 are required for the NK-cell response to secondary infection*

410

411 *T. gondii* infection was one of the first systems in which the IL-12/IFN $\gamma$  axis was  
412 demonstrated (17). More specifically, IL-12-dependent NK-cell IFN $\gamma$  production was shown to  
413 protect against acute *T. gondii* infection (16-18). Thus, IL-12 could be required for NK-cell IFN $\gamma$   
414 production during secondary infection with the parasite in the presence of immune memory. To  
415 test whether IL-12 was involved in secondary NK-cell responses, CPS-immunized mice were  
416 treated with anti-IL-12p40 or were untreated and then were challenged with RH tachyzoites. The  
417 frequency and absolute number of total NK cells and activated IFN $\gamma$ <sup>+</sup> NK cells were measured 3  
418 d later. The frequency of NK cells was not affected by anti-IL-12p40, but their numbers were  
419 significantly lower than in untreated mice (Fig. 8A). Consistent with the previously shown role  
420 of IL-12p40 during acute infection (17, 18), the absence of IL-12p40 during secondary infection  
421 led to a dramatic decrease in IFN $\gamma$  production by NK cells. Both the frequency and number of  
422 IFN $\gamma$ <sup>+</sup> NK cells were comparable to non-challenged control mice. These data show that after  
423 secondary *T. gondii* infection, IL-12p40 is essential for NK-cell IFN $\gamma$  production.

424 In the majority of studies, the role of IL-12 in acute *T. gondii* infection has been assayed  
425 by measuring the p40 subunit of IL-12 (17, 18). However, p40 is a subunit of multiple cytokines  
426 and can be biologically active as a subunit of heterodimers IL-12p70 and IL-23 as well as mono-  
427 and homodimers (56-58). Therefore, we more specifically addressed the role of IL-12 in NK-cell  
428 activation during secondary infection by neutralizing IL-12p70 by antibody treatment during RH  
429 reinfection of CPS-immunized mice. Consistent with the anti-IL12p40 data, the blockade of IL-  
430 12p70 did not significantly affect NK-cell frequency, but NK-cell numbers were reduced  
431 (Supplemental Fig. 4). In contrast to anti-IL-12p40, anti-IL-12p70 treatment did not lead to a

432 significant decrease in the frequency or number of IFN $\gamma$ -producing NK cells. As this was an  
433 unexpected result, we further tested the role of IL-12p70 in NK-cell activation in IL-12p35 KO  
434 mice. Although T cells do not develop memory in the absence of IL-12 in IL-12p35 KO mice  
435 (59), we could use this mouse model because the NK-cell response to secondary *T. gondii*  
436 infection did not require T-cell help. Flow cytometry analysis revealed that both the frequency  
437 and number of total and IFN $\gamma$ -producing NK cells in IL-12p35 KO mice were lower than in WT  
438 mice in response to secondary infection (Fig. 8B). The differences between the antibody  
439 treatment and KO mice could be explained by an incomplete neutralization of IL-12p70 by the  
440 antibody *in vivo*. Nevertheless, both approaches showed that IL-12p70 was essential for  
441 increased NK-cell numbers and IFN $\gamma$  production during secondary *T. gondii* infection.

442 In contrast to a complete absence of NK-cell IFN $\gamma$  production after anti-IL-12p40  
443 blockade, some percentage of NK cells still produced IFN $\gamma$  in mice treated with anti-IL-12p70  
444 and in IL-12p35 KO mice. One potential explanation for this is that there is an IL-  
445 12p70-independent and p40-dependent mechanism involved in NK-cell activation and IFN $\gamma$   
446 production during secondary infection. Because IL-12p40 is also a subunit of the cytokine IL-23,  
447 we tested whether IL-23 could also activate NK cells during secondary *T. gondii* infection. IL-23  
448 extends the life of p40 KO mice during acute *T. gondii* infection (60). To find the role of IL-23  
449 in activation of NK cells during reinfection, B6 mice were treated with anti-IL-23p19 5 to 6 wk  
450 after CPS immunization during secondary infection with RH. The number of NK cells was  
451 significantly lower in mice treated with anti-IL-23p19 as compared with control mice (Fig. 8C).  
452 The frequency of IFN $\gamma$ + NK cells after reinfection was not affected by IL-23p19 blockade.  
453 However, the absolute number of IFN $\gamma$ -producing NK cells was reduced. These data show that  
454 during secondary infection IL-23 was essential for the increase in NK-cell numbers rather than

455 IFN $\gamma$  production. These data show that the NK-cell response to secondary *T. gondii* infection in  
456 the presence of immune memory is dependent on IL-12p70 and IL-23. IL-12p70 is essential for  
457 the NK-cell increase in numbers and for IFN $\gamma$  production, and IL-23 is essential for the NK-cell  
458 increase in numbers.

459

460 *NK-cell maturation is reduced in the absence of IL-12 and IL-23*

461

462         Based on the phenotypic analysis of NK cells responding to the secondary *T. gondii*  
463 infection, the majority (~73%) of IFN $\gamma$ -producing NK cells expressed KLRG1 (Fig. 4D).  
464 KLRG1 expression is dependent on IL-12, which also induces expression of the transcription  
465 factor T-bet and IFN $\gamma$  (61, 62). As IL-12p70 and IL-23 were required for NK-cell IFN $\gamma$   
466 production during secondary *T. gondii* infection, we next asked if these cytokines were also  
467 involved in the maturation of NK cells. The frequency of KLRG1<sup>+</sup> NK cells was significantly  
468 lower in the absence of IL-12p40 and IL-23 after anti-IL-12p40 treatment and in the absence of  
469 IL-12p70 in IL-12p35 KO mice (Fig. 9A, 9B). In addition, the KLRG1<sup>+</sup> NK cells were also  
470 reduced in the absence of IL-23 after anti-IL-23p19 treatment (Fig. 9C). Thus, NK cell  
471 maturation during secondary infection is also dependent on both IL-12p70 and IL-23.

472

## 473         **Discussion**

474

475         Recent evidence suggests that NK cells can participate in adaptive immunity by  
476 developing memory-like features or as immune effector cells regulated by memory T cells (3, 28,  
477 31, 39, 51, 54). Whether NK cells contribute to long-term adaptive immune responses to *T.*

478 *gondii* infection is not known. In this study we used a vaccine challenge model of *T. gondii*  
479 infection and showed that NK cells were required for protection during secondary infection when  
480 T-cell memory was present. However, adoptive transfer and fate mapping experiments indicated  
481 that NK cells did not develop cell-intrinsic memory-like characteristics and did not persist after  
482 primary *T. gondii* infection. NK-cell responses to secondary infection were dependent on new  
483 NK-cell generation and required cell-extrinsic factors IL-12/23p40, IL-12p70 and IL-23  
484 cytokines to become activated and to become mature. Although NK cells did not develop  
485 memory-like features during *T. gondii* infection, they were essential for control of secondary  
486 parasite infection in an IL-12p70– and IL-23–dependent manner. Our results demonstrate a  
487 novel role for NK cells as innate immune cells that contribute significantly to secondary *T.*  
488 *gondii* infection, and both IL-12p70 and IL-23 are involved in this process. This study highlights  
489 the potential for NK cells to boost adaptive immunity against secondary infection in individuals  
490 whose immune systems become compromised.

491         Protection against secondary *T. gondii* infection is provided mainly by memory CD8+ T  
492 cells and was defined using vaccine and challenge approaches (35, 63, 64). How other immune  
493 cells, including NK cells, might contribute to this protection has not been clear. In a previous *T.*  
494 *gondii* vaccine challenge study performed in mice deficient for CD8+ T cells, cells expressing  
495 markers of NK cells including NK1.1 and ASGM1 provided protection against secondary  
496 infection (32). This study suggested that NK cells could substitute for CD8+ T cells in  
497 immunocompromised mice during an adaptive immune recall response. Whether this was also  
498 occurring in immunocompetent mice was not known. In our study, we demonstrated that  
499 NK1.1+ cells are critical for protection in immunocompetent mice in the presence of memory  
500 CD4+ and CD8+ T cells. Anti-NK1.1 treatment of vaccinated animals prior to lethal challenge

501 resulted in significantly increased parasite burdens both in short-term and long-term infection. In  
502 addition, NK1.1+CD3<sup>-</sup> NK cells increased with a similar kinetic profile as compared with CD8<sup>+</sup>  
503 T cells at the site of reinfection. Thus, we found that in addition to CD8<sup>+</sup> T cells, NK cells  
504 contributed to control of secondary *T. gondii* infection in the presence of intact T-cell memory.

505 NK cells protect against primary *T. gondii* infection by producing IFN $\gamma$  rather than by  
506 direct lysis of infected cells (16, 17, 26). We found that NK cells produce IFN $\gamma$ , become  
507 cytotoxic (CD107a<sup>+</sup>) and are polyfunctional (IFN $\gamma$ +CD107a<sup>+</sup>) in response to secondary  
508 infection. However, whereas the frequency of IFN $\gamma$ -producing NK cells increased, the level of  
509 NK-cell cytotoxicity did not increase after reinfection. This suggests that IFN $\gamma$  production could  
510 be the main NK-cell function necessary for protection during secondary parasite challenge in a  
511 manner similar to that which occurs during primary *T. gondii* infection (16-21).

512 A hallmark of NK cells that develop memory-like features is their ability to respond  
513 more efficiently and robustly to a secondary challenge similar to memory CD8<sup>+</sup> T cells (2, 3,  
514 28). For example, in a contact hypersensitivity model, hapten-sensitized *Rag2*<sup>-/-</sup> mice, which have  
515 neither T cells nor B cells, are more sensitive to secondary challenge than non-sensitized mice  
516 (2). Ly49H<sup>+</sup> NK cells in mice infected with MCMV develop a more robust response to  
517 secondary MCMV infection (3). T and B cell-deficient mice immunized with influenza or HIV-  
518 1 virus-like particles (VLPs) have an increased response to secondary exposure to the  
519 corresponding VLPs (29). NK cells cultured with IL-12, IL-15 and IL-18 also develop the ability  
520 to respond more robustly to secondary stimulation (28). Whether primary *T. gondii* infection  
521 induces NK cells to develop a more efficient response to secondary parasite infection is not  
522 known. Our data indicate that *T. gondii* immunization of WT mice did not result in a more robust  
523 or efficient secondary NK-cell response during challenge infection. *T. gondii* immunization of T

524 and B cell-deficient (*Rag1*<sup>-/-</sup>) mice did not lead to the development of stronger NK  
525 cell-dependent protection against secondary parasite infection. Expression of RAG1 early during  
526 NK-cell differentiation in the bone marrow has been suggested to be required for development of  
527 memory-like features in response to MCMV (48). Therefore, this may be one reason why we did  
528 not observe better NK cell-dependent protection in the *Rag1*<sup>-/-</sup> mice. However, there was no  
529 increase in protection against parasite challenge in immunodeficient *Rag2*<sup>-/-</sup>*γc*<sup>-/-</sup> or WT mice that  
530 received purified *T. gondii*-experienced NK cells from immunized WT mice. Thus, our data  
531 suggest that although NK cells are an important component for the control of *T. gondii* challenge  
532 infection in the presence of T-cell memory, they do not appear to acquire cell-intrinsic features  
533 of a memory-like phenotype.

534 NK cells that develop memory-like features also acquire the ability to persist long-  
535 term(3, 31). They can also have specific tissue tropism (2, 3, 31). For example, liver NK cells  
536 develop a hapten-specific response (2). Liver and lung NK cells from influenza-immunized and  
537 liver NK cells from attenuated VSV-infected *Rag1*<sup>-/-</sup> donors mediate protection in *Rag2*<sup>-/-</sup>*γc*<sup>-/-</sup>  
538 recipients (29). MCMV- and SIV-specific NK cells are found in the spleen and other organs (3,  
539 31). Our fate mapping studies using reporter NKp46-CreERT2 × Rosa26-YFP mice indicate that,  
540 similar to their protective qualities, *T. gondii*-experienced and naïve NK cells were not  
541 intrinsically different in their ability to persist, in contrast to the MCMV-mediated increase in the  
542 number of long-lived YFP+ NK cells (9). We also did not observe any increase in YFP+ NK  
543 cells after *T. gondii* immunization in the peritoneum, spleen or bone marrow. This further  
544 supported the finding that NK cells do not develop cell-intrinsic characteristics of immune  
545 memory in response to *T. gondii* infection. Our results raise an important question: Why do NK  
546 cells not further differentiate and acquire memory-like characteristics during *T. gondii* infection



547 as compared with hapten, virus or cytokine stimulation? Answering this question could explain  
548 why this parasite can escape and persist and be a continual problem for the host and also could  
549 help improve vaccine design.

550 NK-cell memory might not be generated in response to *T. gondii* infection for several  
551 reasons. These include the nature of NK-cell recognition of *T. gondii* infection or the lack  
552 thereof, co-stimulatory factors and the cytokine milieu. The development of memory-like  
553 features in NK cells in response to MCMV and HCMV infections requires signal 1 (antigen),  
554 signal 2 (co-stimulation) and signal 3 (cytokines) (3, 41, 43, 65, 66). One explanation for NK  
555 cells not developing intrinsic memory to *T. gondii* infection could be that the parasite does not  
556 itself express or does not induce a host cell to express a specific activating ligand for NK cells,  
557 and thus activation of NK cells lacks signal 1. In support of this possibility, our data indicate that  
558 after *T. gondii* immunization or after immunization and challenge no dominant NK-cell receptor  
559 was enriched within the responding population of total NK cells. We also do not observe any  
560 specific NK-cell receptor enrichment among the total responding NK-cell population during  
561 acute *T. gondii* infection, regardless of parasite virulence (42). Overall, we observed a wide array  
562 of NK-cell populations based on NK-cell receptor expression, indicating that there was a global  
563 response to infection. This could be common among apicomplexan infections because the NK-  
564 cell response to *Plasmodium falciparum* infection is also cell extrinsic (53). It is possible that NK  
565 cells evolved specific recognition mechanisms for viruses and bacteria but not for protozoan  
566 pathogens.

567 NK cells might not develop a memory-like response to *T. gondii* because they do not  
568 receive the necessary co-stimulatory signals or combination of cytokine stimulation. In response  
569 to MCMV and HCMV, specific co-stimulatory molecules and their interactions with their

570 cognate ligands are essential for the generation of memory NK cells (43, 66, 67). DNAM-1 is  
571 important for memory NK-cell development during MCMV infection (43). We found that  
572 DNAM-1 co-stimulation was not required for the NK-cell response because its blockade did not  
573 alter NK-cell expansion or IFN $\gamma$  production during secondary *T. gondii* infection. Other  
574 costimulatory molecules could also be involved. CD28 is important for maximizing the NK-cell  
575 responses to acute *T. gondii* infection (68). In addition to a potential alteration of co-stimulatory  
576 signals, *T. gondii* could induce higher expression of co-inhibitory molecules TIGIT and CD96  
577 (69), which could then inhibit NK-cell memory formation; however, we did not observe any  
578 significant increases in the expression of these molecules during secondary *T. gondii* infection  
579 (data not shown).

580         Type I IFN and IL-12 are essential for expansion and survival of MCMV-specific NK  
581 cells (65, 70). Cytokine-induced memory-like NK cells can be generated in mice and humans  
582 after stimulation with IL-12, IL-18 and IL-15 (6, 28). All of these cytokines are produced during  
583 acute *T. gondii* infection (17, 42, 71, 72), with the exception of Type I IFNs (73). Therefore, it is  
584 surprising that NK cells do not further differentiate into memory-like cells. The development of  
585 NK-cell memory-like responses may require an activating receptor, costimulatory molecules and  
586 the correct combination of cytokines during *T. gondii* infection. Dissecting the reasons why NK  
587 cells do not develop memory-like features to *T. gondii* in a cell-intrinsic manner will be  
588 important future questions to address.

589         Because a second wave of NK-cell responses was critical for the control of secondary *T.*  
590 *gondii* infection in the presence of memory T cells, we addressed how the NK-cell extrinsic  
591 immune environment of vaccinated animals regulated their response. After *Rabies* virus  
592 vaccination secondary NK-cell responses depend on the presence of memory T cells (51). During

593 *Rabies* virus secondary challenge, IL-2 producing antigen-specific memory CD4<sup>+</sup> T cells in  
594 combination with IL-12 and IL-18 from accessory cells reactivated NK-cells. NK-cell responses  
595 in PBMCs of patients vaccinated with a *Plasmodium falciparum* specific vaccine correlated with  
596 IL-2 production by T cells (54). These studies suggest that memory T cells could provide cell  
597 extrinsic signals important for secondary NK cell responses to these infections. Unlike these  
598 previous studies, we did not find a role for antigen-specific memory CD4<sup>+</sup> or CD8<sup>+</sup> T cells in  
599 helping NK-cell responses to secondary infection. Activation of NK cells that is independent of  
600 memory T cells may have important implications for individuals that are T-cell deficient.

601 Multiple studies demonstrate that IL-12p40 is essential for protective immunity against *T.*  
602 *gondii* infection, including for NK cell IFN $\gamma$  production during primary infection (17, 18, 74-76).  
603 Our data indicate that NK-cell activation in the presence of memory T cells during secondary  
604 infection of immunized animals was also dependent on the IL-12 subunit p40. IL-12p40 is a  
605 subunit of bioactive IL-12p70 (IL-12) and also of IL-23 (77). IL-12 and IL-23 are both capable  
606 of inducing IFN $\gamma$  production by NK and T cells (77-79). During primary *T. gondii* infection, IL-  
607 12 is the main mediator of protection, and IL-23 provides protection if IL-12 is absent (60).  
608 Surprisingly, that study also demonstrated that IL-12p35 KO mice survived longer than IL-  
609 12/23p40 KO mice during *T. gondii* infection. The difference in protection was independent of T  
610 cells, raising an interesting question about the role of each of these cytokines in activating the  
611 non-T cell compartment to control primary *T. gondii* infection. Our results demonstrated that  
612 both IL-12 and IL-23 contribute to NK-cell responses during secondary *T. gondii* infection. NK-  
613 cell numbers were reduced in the absence of IL-12 or IL-23 during secondary *T. gondii* infection.  
614 However, NK-cell IFN $\gamma$  was only partially reduced in the absence of IL-12, and depletion of IL-  
615 23 did not affect the frequency of IFN $\gamma$ <sup>+</sup> NK cells at the site of infection. Using anti-IL-12p40

616 treatment, we observed a near complete elimination of the secondary NK-cell response during  
617 parasite challenge. Thus, IL-12 is important in activating NK cells to produce IFN $\gamma$ , whereas IL-  
618 23 may be more important for increasing the number of NK cells at the site of secondary  
619 infection in the presence of memory T cells. The mechanisms by which IL-12 and IL-23 work  
620 together to regulate NK-cell numbers and their IFN $\gamma$  production in a *T. gondii* vaccine challenge  
621 situation could be via inducing NK-cell proliferation, migration and the ability to survive after  
622 infection.

623 In summary, we demonstrated that NK cells play an important protective role beyond  
624 primary *T. gondii* infection and in the presence of memory T cells after vaccination and during a  
625 challenge infection. NK cells become activated and help control the parasite during secondary  
626 infection. In their absence, parasite burdens are increased both in short-term and long-term  
627 challenge infection. NK cells do not develop cell-intrinsic characteristics of memory and rely on  
628 cell-extrinsic IL-12 and IL-23 to respond during secondary challenge. Thus, NK cells provide  
629 protection in the presence of memory T cells and should be taken into consideration in  
630 vaccination and immunotherapy strategies to combat *T. gondii* infection.

631

632 **FIGURE 1.** NK cells are required for protection during secondary *T. gondii* infection. **(A and B)**  
633 B6 mice were infected i.p. with  $1 \times 10^6$  CPS. Five to 6 wk later, mice were infected i.p. with **(A)**  
634  $1 \times 10^6$  RH tachyzoites or **(B)** 100 brain ME49 cysts and were treated with anti-NK1.1 (PK136)  
635 or were untreated. **(A)** Two days after RH infection, the number of parasites was compared  
636 among PEC DNA (600 ng/sample) based on semiquantitative real-time PCR for the *T. gondii*  
637 B1. Concatenated data from four independent experiments, n = 3 or 4 mice/group. **(B)** *T. gondii*  
638 cysts were quantified in the brains of B6 mice 5 wk after ME49 infection. Representative data  
639 from one of two independent experiments, n = 3–5 mice/group. Data are the mean  $\pm$  SD with  
640 individual data points. Unpaired Student's t-test with Welch's correction, \*p < 0.05, \*\*p < 0.01.

641

642 **FIGURE 2.** NK cells become activated during an adaptive recall response. **(A-I)** B6 mice were  
643 infected i.p. with  $1 \times 10^6$  CPS tachyzoites and were then reinfected i.p. with  $1 \times 10^3$  RH  
644 tachyzoites 5–6 wk later. PECs were analyzed by flow cytometry at d 1, 3, 5, 7 and 10 **(A, B** and  
645 **C)** or d 3 **(D-I)** after RH infection. **(A)** Representative contour plots of the cells expressing  
646 NK1.1 and CD3 in live lymphocytes. **(B)** The percentages and **(C)** numbers per PEC of  
647 CD3–NK1.1+ (ILCs), CD3+NK1.1+ (NK T cells), CD3+NK1.1–CD4+ (CD4+ T cells) and  
648 CD3+NK1.1–CD8b+ (CD8+ T cells) among live lymphocytes. Data from one of two  
649 independent experiments, n = 3 or 4 mice/group. Data are the mean  $\pm$  SD. **(D, E)** The  
650 percentages and **(E)** numbers of NK cells (CD49b+NKp46+) among CD3– live lymphocytes. **(F-**  
651 **I)** The percentages and numbers of IFN $\gamma$ +, CD107a+ and IFN $\gamma$ +CD107a+ NK cells. **(D-I)**  
652 Concatenated data from four experiments, n = 3 or 4 mice/group. Data are the mean  $\pm$  SD. \*\*p <  
653 0.01, \*\*\*p < 0.001, \*\*\*\*p < 0.0001, one-way ANOVA.

654

655 **FIGURE 3.** Multiple NK-cell subpopulations are activated during secondary *T. gondii* infection.

656 **(A-D)** B6 mice were infected i.p. with  $1 \times 10^6$  CPS and 5–6 wk later were infected i.p. with  $1 \times$

657  $10^3$  RH tachyzoites. PECs were analyzed by flow cytometry at d 3 after RH infection. **(A and B)**

658 The frequency of CD94+, Ly49I+, Ly49H+ and Ly49D+ cells within the total **(A)** and IFN $\gamma$ +

659 **(B)** NK cells. **(C and D)** The frequency of NK cells expressing combinations of the receptors

660 (CD94, Ly49I, Ly49H, Ly49D) within the total **(C)** and IFN $\gamma$ + **(D)** NK cells. Representative

661 graphs from one of two independent experiments with n = 4 mice/group. Data are the mean  $\pm$

662 SD. \*p < 0.05, \*\*p < 0.01, \*\*\*p < 0.001, \*\*\*\*p < 0.0001, one-way and two-way ANOVA.

663

664 **FIGURE 4.** Activated NK cells during secondary *T. gondii* infection are mature. **(A-H)** B6 mice  
665 were infected i.p. with  $1 \times 10^6$  CPS and 5–6 wk later were infected i.p. with  $1 \times 10^3$  RH  
666 tachyzoites. PECs were analyzed by flow cytometry at d 3 after RH infection. **(A and B)** The  
667 frequency of R0 (CD27–CD11b–), R1 (CD27+CD11b–), R2 (CD27+CD11b+), R3  
668 (CD27–CD11b+) NK cells within the total **(A)** and IFN $\gamma$ + **(B)** NK cells. **(C and D)** The  
669 frequency of KLRG1+ NK cells within total **(C)** and IFN $\gamma$ + **(D)** NK cells. **(E and F)** The  
670 frequency of DNAM-1+ NK cells within the total **(E)** and IFN $\gamma$ + **(F)** NK cells. **(G and H)** The  
671 frequency of NK cells expressing the combinations of the receptors (KLRG1, DNAM1, CD27,  
672 CD11b) within the total **(G)** and IFN $\gamma$ + **(H)** NK cells. Representative graphs from one of two  
673 independent experiments with n = 4 mice/group. Data are the mean  $\pm$  SD. \*p < 0.05, \*\*p < 0.01,  
674 \*\*\*p < 0.001, \*\*\*\*p < 0.0001, one-way and two-way ANOVA.



675

676 **FIGURE 5.** *T. gondii*-experienced and naïve NK cells are not intrinsically different with respect  
677 to their ability to protect against subsequent infection. (A-C) Survival after infection with  $1 \times 10^3$   
678 RH tachyzoites i.p. (A) or with 10 brain ME49 cysts i.p. (B) or i.g. (C) was compared between  
679 *Rag1*<sup>-/-</sup> mice 5–6 wk after CPS immunization and non-immunized *Rag1*<sup>-/-</sup> mice. Each graph  
680 represents concatenated data from two independent experiments, n = 3–6 mice/group. (D) NK  
681 cells were purified from spleens of naïve B6 mice (naive NK) and from mice 5 wk after CPS  
682 immunization (CPS NK) and from mice 5 wk after initial CPS immunization that was followed  
683 by a second round of immunization at wk 2 (2×CPS NK) B6 mice. Purified NK cells were then  
684 transferred i.v. into *Rag2*<sup>-/-</sup>*γc*<sup>-/-</sup> mice ( $1.4 \times 10^6$  NK cells/mouse). Recipient mouse survival after  
685 i.g. infection with 10 ME49 cysts was determined. The data represent one of two independent  
686 experiments, n = 5 mice per experiment. ns, not significant. The log-rank (Mantel-Cox) test was  
687 used to evaluate survival rates.

688

689 **FIGURE 6.** *T. gondii*-experienced and naïve NK cells are not intrinsically different in their  
690 ability to persist. (A-C) NKp46-CreERT2 × Rosa26-YFP mice were i.g. treated with tamoxifen  
691 for five consecutive days beginning on the day of CPS immunization. Five weeks after  
692 tamoxifen treatment, the frequency and number of YFP+ NK cells (gated as CD49b+NKp46+  
693 within CD3- live lymphocytes) were compared between CPS-immunized and non-immunized  
694 mice by flow cytometry in the PEC (A), spleen (B) and BM (C). The data represent one of two  
695 experiments, n = 4–7 mice/group. Data are the mean ± SD. ns, not significant. Statistical analysis  
696 was performed using one-way ANOVA.

697

698

699 **FIGURE 7.** NK cells are activated independently of T cells. B6 mice were infected i.p. with  $1 \times$   
700  $10^6$  CPS tachyzoites. Five to 6 weeks later, mice were infected i.p. with  $1 \times 10^3$  RH tachyzoites  
701 and treated with antibodies that deplete CD4+ or CD8+ T cells. Three days after RH infection,  
702 the frequency and number of NK cells (CD49b+NKp46+CD3- live lymphocytes) and their IFN $\gamma$   
703 production in PECs were measured by flow cytometry. Representative contour plots from one of  
704 two experiments. Concatenated graphs from two independent experiments, n = 4 mice/group.  
705 Data are the mean  $\pm$  SD. ns, not significant; \*\*p < 0.01, one-way ANOVA.

706

707

708 **FIGURE 8.** IL-12 and IL-23 are required for the NK-cell response to secondary *T. gondii*  
709 infection. (A-C) B6 (A and C) and IL-12p35 KO (B) mice were i.p. infected with  $1 \times 10^6$  CPS  
710 and 5–6 wk later were i.p. infected with  $1 \times 10^3$  RH tachyzoites. NK cells  
711 (CD49b+NKp46+CD3– lymphocytes) and their IFN $\gamma$  production were analyzed in PECs at 3 d  
712 after RH infection by flow cytometry. (A) Mice were treated with anti-IL-12p40 blocking  
713 antibody during RH infection. Representative contour plots and graphs are shown from one of  
714 two independent experiments. Concatenated graphs from two independent experiments, n = 3–5  
715 mice/group. (B) NK-cell frequency and IFN $\gamma$  production in IL-12p35 KO mice. Representative  
716 contour plots from one of two independent experiments. Concatenated graphs from two  
717 independent experiments, n = 3 mice/group. (C) Mice were treated with anti-IL-23p19 during  
718 RH infection. Representative contour plots from one of two independent experiments.  
719 Concatenated graphs from two independent experiments, n = 4 mice/group. Data are the mean  $\pm$   
720 SD. ns, not significant; \*p < 0.05, \*\*p < 0.01, \*\*\*p < 0.001, \*\*\*\*p < 0.0001, ordinary one-way  
721 ANOVA.

722

723 **FIGURE 9.** NK-cell maturation is reduced in the absence of IL-12 and IL-23 during secondary  
724 *T. gondii* infection. (A-C) B6 (A and C) and IL-12p35 KO (B) mice were i.p. infected with  $1 \times$   
725  $10^6$  CPS1-1 and 5–6 wk later were i.p. infected with  $1 \times 10^3$  RH tachyzoites. KLRG1 expression  
726 on NK cells (CD49b+NKp46+CD3– live lymphocytes) was analyzed by flow cytometry in PECs  
727 at 3 d after RH infection. (A) Mice were treated with anti-IL-12p40 blocking antibody during RH  
728 infection. Representative contour plots and graphs from one of two independent experiments.  
729 Concatenated graphs from two independent experiments,  $n = 3-5$  mice/group. (B) NK-cell  
730 KLRG1 expression in IL-12p35 KO mice. Representative contour plots from one of two  
731 independent experiments. Concatenated graphs from two independent experiments,  $n = 3$   
732 mice/group. (C) Mice were treated with anti-IL-23p19 antibody during RH infection.  
733 Representative plots and graphs from one of two independent experiments. Concatenated graphs  
734 from two independent experiments,  $n = 3$  or 4 mice/group. Data are the mean  $\pm$  SD. ns, not  
735 significant; \* $p < 0.05$ , \*\* $p < 0.01$ , \*\*\* $p < 0.001$ , \*\*\*\* $p < 0.0001$ , one-way ANOVA.

736

737

738

739

740

741

742

743

744 **References**

745

- 746 1. Beaulieu AM. 2018. Memory responses by natural killer cells. *J Leukoc Biol*  
747 doi:10.1002/JLB.1RI0917-366R.
- 748 2. O'Leary JG, Goodarzi M, Drayton DL, von Andrian UH. 2006. T cell- and B cell-  
749 independent adaptive immunity mediated by natural killer cells. *Nat Immunol* 7:507-16.
- 750 3. Sun JC, Beilke JN, Lanier LL. 2009. Adaptive immune features of natural killer cells.  
751 *Nature* 457:557-61.
- 752 4. Arase H, Mocarski ES, Campbell AE, Hill AB, Lanier LL. 2002. Direct recognition of  
753 cytomegalovirus by activating and inhibitory NK cell receptors. *Science* 296:1323-6.
- 754 5. Lopez-Botet M, Muntasell A, Vilches C. 2014. The CD94/NKG2C<sup>+</sup> NK-cell subset on  
755 the edge of innate and adaptive immunity to human cytomegalovirus infection. *Semin*  
756 *Immunol* 26:145-51.
- 757 6. Romee R, Schneider SE, Leong JW, Chase JM, Keppel CR, Sullivan RP, Cooper MA,  
758 Fehniger TA. 2012. Cytokine activation induces human memory-like NK cells. *Blood*  
759 120:4751-60.
- 760 7. Cooper MA, Fehniger TA, Ponnappan A, Mehta V, Wewers MD, Caligiuri MA. 2001.  
761 Interleukin-1beta costimulates interferon-gamma production by human natural killer  
762 cells. *Eur J Immunol* 31:792-801.
- 763 8. Ni J, Miller M, Stojanovic A, Garbi N, Cerwenka A. 2012. Sustained effector function of  
764 IL-12/15/18-preactivated NK cells against established tumors. *J Exp Med* 209:2351-65.
- 765 9. Nabekura T, Lanier LL. 2016. Tracking the fate of antigen-specific versus cytokine-  
766 activated natural killer cells after cytomegalovirus infection. *J Exp Med* 213:2745-2758.
- 767 10. Hill DE, Chirukandoth S, Dubey JP. 2005. Biology and epidemiology of *Toxoplasma*  
768 *gondii* in man and animals. *Anim Health Res Rev* 6:41-61.
- 769 11. Kodym P, Maly M, Beran O, Jilich D, Rozsypal H, Machala L, Holub M. 2015.  
770 Incidence, immunological and clinical characteristics of reactivation of latent  
771 *Toxoplasma gondii* infection in HIV-infected patients. *Epidemiol Infect* 143:600-7.
- 772 12. Flegr J, Prandota J, Sovickova M, Israili ZH. 2014. Toxoplasmosis--a global threat.  
773 Correlation of latent toxoplasmosis with specific disease burden in a set of 88 countries.  
774 *PLoS One* 9:e90203.
- 775 13. Jones JL, Dubey JP. 2012. Foodborne toxoplasmosis. *Clin Infect Dis* 55:845-51.
- 776 14. Coppens I. 2014. Exploitation of auxotrophies and metabolic defects in *Toxoplasma* as  
777 therapeutic approaches. *Int J Parasitol* 44:109-20.
- 778 15. Radke JB, Burrows JN, Goldberg DE, Sibley LD. 2018. Evaluation of Current and  
779 Emerging Antimalarial Medicines for Inhibition of *Toxoplasma gondii* Growth in Vitro.  
780 *ACS Infect Dis* 4:1264-1274.
- 781 16. Sher A, Oswald IP, Hieny S, Gazzinelli RT. 1993. *Toxoplasma gondii* induces a T-  
782 independent IFN-gamma response in natural killer cells that requires both adherent  
783 accessory cells and tumor necrosis factor-alpha. *J Immunol* 150:3982-9.
- 784 17. Gazzinelli RT, Hieny S, Wynn TA, Wolf S, Sher A. 1993. Interleukin 12 is required for  
785 the T-lymphocyte-independent induction of interferon gamma by an intracellular parasite  
786 and induces resistance in T-cell-deficient hosts. *Proc Natl Acad Sci U S A* 90:6115-9.
- 787 18. Hunter CA, Subauste CS, Van Cleave VH, Remington JS. 1994. Production of gamma  
788 interferon by natural killer cells from *Toxoplasma gondii*-infected SCID mice: regulation  
789 by interleukin-10, interleukin-12, and tumor necrosis factor alpha. *Infect Immun*  
790 62:2818-24.

- 791 19. Goldszmid RS, Caspar P, Rivollier A, White S, Dzutsev A, Hieny S, Kelsall B, Trinchieri  
792 G, Sher A. 2012. NK cell-derived interferon-gamma orchestrates cellular dynamics and  
793 and the differentiation of monocytes into dendritic cells at the site of infection. *Immunity*  
794 36:1047-59.
- 795 20. Askenase MH, Han SJ, Byrd AL, Morais da Fonseca D, Bouladoux N, Wilhelm C,  
796 Konkel JE, Hand TW, Lacerda-Queiroz N, Su XZ, Trinchieri G, Grainger JR, Belkaid Y.  
797 2015. Bone-Marrow-Resident NK Cells Prime Monocytes for Regulatory Function  
798 during Infection. *Immunity* 42:1130-42.
- 799 21. Combe CL, Curiel TJ, Moretto MM, Khan IA. 2005. NK cells help to induce CD8(+)-T-  
800 cell immunity against *Toxoplasma gondii* in the absence of CD4(+) T cells. *Infect Immun*  
801 73:4913-21.
- 802 22. Goldszmid RS, Bafica A, Jankovic D, Feng CG, Caspar P, Winkler-Pickett R, Trinchieri  
803 G, Sher A. 2007. TAP-1 indirectly regulates CD4+ T cell priming in *Toxoplasma gondii*  
804 infection by controlling NK cell IFN-gamma production. *J Exp Med* 204:2591-602.
- 805 23. Hauser WE, Jr., Sharma SD, Remington JS. 1983. Augmentation of NK cell activity by  
806 soluble and particulate fractions of *Toxoplasma gondii*. *J Immunol* 131:458-63.
- 807 24. Kamiyama T, Hagiwara T. 1982. Augmented followed by suppressed levels of natural  
808 cell-mediated cytotoxicity in mice infected with *Toxoplasma gondii*. *Infect Immun*  
809 36:628-36.
- 810 25. Sharma SD, Verhoef J, Remington JS. 1984. Enhancement of human natural killer cell  
811 activity by subcellular components of *Toxoplasma gondii*. *Cell Immunol* 86:317-26.
- 812 26. Denkers EY, Yap G, Scharton-Kersten T, Charest H, Butcher BA, Caspar P, Heiny S,  
813 Sher A. 1997. Perforin-mediated cytolysis plays a limited role in host resistance to  
814 *Toxoplasma gondii*. *J Immunol* 159:1903-8.
- 815 27. Roozbehani M, Falak R, Mohammadi M, Hemphill A, Razmjou E, Meamar AR, Masoori  
816 L, Khoshmirisafa M, Moradi M, Gharavi MJ. 2018. Characterization of a multi-epitope  
817 peptide with selective MHC-binding capabilities encapsulated in PLGA nanoparticles as  
818 a novel vaccine candidate against *Toxoplasma gondii* infection. *Vaccine* 36:6124-6132.
- 819 28. Cooper MA, Elliott JM, Keyel PA, Yang L, Carrero JA, Yokoyama WM. 2009.  
820 Cytokine-induced memory-like natural killer cells. *Proc Natl Acad Sci U S A* 106:1915-  
821 9.
- 822 29. Paust S, Gill HS, Wang BZ, Flynn MP, Moseman EA, Senman B, Szczepanik M, Telenti  
823 A, Askenase PW, Compans RW, von Andrian UH. 2010. Critical role for the chemokine  
824 receptor CXCR6 in NK cell-mediated antigen-specific memory of haptens and viruses.  
825 *Nat Immunol* 11:1127-35.
- 826 30. Abdul-Careem MF, Lee AJ, Pek EA, Gill N, Gillgrass AE, Chew MV, Reid S, Ashkar  
827 AA. 2012. Genital HSV-2 infection induces short-term NK cell memory. *PLoS One*  
828 7:e32821.
- 829 31. Reeves RK, Li H, Jost S, Blass E, Li H, Schafer JL, Varner V, Manickam C, Eslamizar L,  
830 Altfeld M, von Andrian UH, Barouch DH. 2015. Antigen-specific NK cell memory in  
831 rhesus macaques. *Nat Immunol* 16:927-32.
- 832 32. Denkers EY, Gazzinelli RT, Martin D, Sher A. 1993. Emergence of NK1.1+ cells as  
833 effectors of IFN-gamma dependent immunity to *Toxoplasma gondii* in MHC class I-  
834 deficient mice. *J Exp Med* 178:1465-72.
- 835 33. Fox BA, Bzik DJ. 2002. De novo pyrimidine biosynthesis is required for virulence of  
836 *Toxoplasma gondii*. *Nature* 415:926-9.

- 837 34. Gigley JP, Fox BA, Bzik DJ. 2009. Cell-mediated immunity to *Toxoplasma gondii*  
838 develops primarily by local Th1 host immune responses in the absence of parasite  
839 replication. *J Immunol* 182:1069-78.
- 840 35. Gigley JP, Fox BA, Bzik DJ. 2009. Long-term immunity to lethal acute or chronic type II  
841 *Toxoplasma gondii* infection is effectively induced in genetically susceptible C57BL/6  
842 mice by immunization with an attenuated type I vaccine strain. *Infect Immun* 77:5380-8.
- 843 36. Suzuki Y, Orellana MA, Schreiber RD, Remington JS. 1988. Interferon-gamma: the  
844 major mediator of resistance against *Toxoplasma gondii*. *Science* 240:516-8.
- 845 37. Alter G, Malenfant JM, Altfeld M. 2004. CD107a as a functional marker for the  
846 identification of natural killer cell activity. *J Immunol Methods* 294:15-22.
- 847 38. Hammer Q, Ruckert T, Romagnani C. 2018. Natural killer cell specificity for viral  
848 infections. *Nat Immunol* 19:800-808.
- 849 39. Romee R, Rosario M, Berrien-Elliott MM, Wagner JA, Jewell BA, Schappe T, Leong  
850 JW, Abdel-Latif S, Schneider SE, Willey S, Neal CC, Yu L, Oh ST, Lee YS, Mulder A,  
851 Claas F, Cooper MA, Fehniger TA. 2016. Cytokine-induced memory-like natural killer  
852 cells exhibit enhanced responses against myeloid leukemia. *Sci Transl Med* 8:357ra123.
- 853 40. Dokun AO, Kim S, Smith HR, Kang HS, Chu DT, Yokoyama WM. 2001. Specific and  
854 nonspecific NK cell activation during virus infection. *Nat Immunol* 2:951-6.
- 855 41. Hammer Q, Ruckert T, Borst EM, Dunst J, Haubner A, Durek P, Heinrich F, Gasparoni  
856 G, Babic M, Tomic A, Pietra G, Nienen M, Blau IW, Hofmann J, Na IK, Prinz I,  
857 Koenecke C, Hemmati P, Babel N, Arnold R, Walter J, Thurley K, Mashreghi MF,  
858 Messerle M, Romagnani C. 2018. Peptide-specific recognition of human cytomegalovirus  
859 strains controls adaptive natural killer cells. *Nat Immunol* 19:453-463.
- 860 42. Ivanova DL, Fatima R, Gigley JP. 2016. Comparative Analysis of Conventional Natural  
861 Killer Cell Responses to Acute Infection with *Toxoplasma gondii* Strains of Different  
862 Virulence. *Frontiers in Immunology* 7.
- 863 43. Nabekura T, Kanaya M, Shibuya A, Fu G, Gascoigne NR, Lanier LL. 2014.  
864 Costimulatory molecule DNAM-1 is essential for optimal differentiation of memory  
865 natural killer cells during mouse cytomegalovirus infection. *Immunity* 40:225-34.
- 866 44. Nabekura T, Lanier LL. 2014. Antigen-specific expansion and differentiation of natural  
867 killer cells by alloantigen stimulation. *J Exp Med* 211:2455-65.
- 868 45. Chiossone L, Chaix J, Fuseri N, Roth C, Vivier E, Walzer T. 2009. Maturation of mouse  
869 NK cells is a 4-stage developmental program. *Blood* 113:5488-96.
- 870 46. Mombaerts P, Iacomini J, Johnson RS, Herrup K, Tonegawa S, Papaioannou VE. 1992.  
871 RAG-1-deficient mice have no mature B and T lymphocytes. *Cell* 68:869-77.
- 872 47. Kondo M, Weissman IL, Akashi K. 1997. Identification of clonogenic common lymphoid  
873 progenitors in mouse bone marrow. *Cell* 91:661-72.
- 874 48. Karo JM, Schatz DG, Sun JC. 2014. The RAG recombinase dictates functional  
875 heterogeneity and cellular fitness in natural killer cells. *Cell* 159:94-107.
- 876 49. Mazurier F, Fontanellas A, Salesse S, Taine L, Landriau S, Moreau-Gaudry F, Reiffers J,  
877 Peault B, Di Santo JP, de Verneuil H. 1999. A novel immunodeficient mouse model--  
878 RAG2 x common cytokine receptor gamma chain double mutants--requiring exogenous  
879 cytokine administration for human hematopoietic stem cell engraftment. *J Interferon*  
880 *Cytokine Res* 19:533-41.
- 881 50. Sun JC, Beilke JN, Bezman NA, Lanier LL. 2011. Homeostatic proliferation generates  
882 long-lived natural killer cells that respond against viral infection. *J Exp Med* 208:357-68.



- 883 51. Horowitz A, Behrens RH, Okell L, Fooks AR, Riley EM. 2010. NK cells as effectors of  
884 acquired immune responses: effector CD4<sup>+</sup> T cell-dependent activation of NK cells  
885 following vaccination. *J Immunol* 185:2808-18.
- 886 52. Bihl F, Pecheur J, Breart B, Poupon G, Cazareth J, Julia V, Glaichenhaus N, Braud VM.  
887 2010. Primed antigen-specific CD4<sup>+</sup> T cells are required for NK cell activation in vivo  
888 upon *Leishmania major* infection. *J Immunol* 185:2174-81.
- 889 53. Horowitz A, Newman KC, Evans JH, Korbel DS, Davis DM, Riley EM. 2010. Cross-talk  
890 between T cells and NK cells generates rapid effector responses to *Plasmodium*  
891 *falciparum*-infected erythrocytes. *J Immunol* 184:6043-52.
- 892 54. Horowitz A, Hafalla JC, King E, Lusingu J, Dekker D, Leach A, Moris P, Cohen J,  
893 Vekemans J, Villafana T, Corran PH, Bejon P, Drakeley CJ, von Seidlein L, Riley EM.  
894 2012. Antigen-specific IL-2 secretion correlates with NK cell responses after  
895 immunization of Tanzanian children with the RTS,S/AS01 malaria vaccine. *J Immunol*  
896 188:5054-62.
- 897 55. Yi H, Zhen Y, Zeng C, Zhang L, Zhao Y. 2008. Depleting anti-CD4 monoclonal  
898 antibody (GK1.5) treatment: influence on regulatory CD4<sup>+</sup>CD25<sup>+</sup>Foxp3<sup>+</sup> T cells in  
899 mice. *Transplantation* 85:1167-74.
- 900 56. Cooper AM, Khader SA. 2007. IL-12p40: an inherently agonistic cytokine. *Trends*  
901 *Immunol* 28:33-8.
- 902 57. Abdi K, Singh NJ, Spooner E, Kessler BM, Radaev S, Lantz L, Xiao TS, Matzinger P,  
903 Sun PD, Ploegh HL. 2014. Free IL-12p40 monomer is a polyfunctional adaptor for  
904 generating novel IL-12-like heterodimers extracellularly. *J Immunol* 192:6028-36.
- 905 58. Gounder AP, Yokoyama CC, Jarjour NN, Bricker TL, Edelson BT, Boon ACM. 2018.  
906 Interferon induced protein 35 exacerbates H5N1 influenza disease through the expression  
907 of IL-12p40 homodimer. *PLoS Pathog* 14:e1007001.
- 908 59. Wilson DC, Grotenbreg GM, Liu K, Zhao Y, Frickel EM, Gubbels MJ, Ploegh HL, Yap  
909 GS. 2010. Differential regulation of effector- and central-memory responses to  
910 *Toxoplasma gondii* Infection by IL-12 revealed by tracking of Tgd057-specific CD8<sup>+</sup> T  
911 cells. *PLoS Pathog* 6:e1000815.
- 912 60. Lieberman LA, Cardillo F, Owyang AM, Rennick DM, Cua DJ, Kastelein RA, Hunter  
913 CA. 2004. IL-23 provides a limited mechanism of resistance to acute toxoplasmosis in  
914 the absence of IL-12. *J Immunol* 173:1887-93.
- 915 61. Joshi NS, Cui W, Chandele A, Lee HK, Urso DR, Hagman J, Gapin L, Kaech SM. 2007.  
916 Inflammation directs memory precursor and short-lived effector CD8<sup>(+)</sup> T cell fates via  
917 the graded expression of T-bet transcription factor. *Immunity* 27:281-95.
- 918 62. Wilson DC, Matthews S, Yap GS. 2008. IL-12 signaling drives CD8<sup>+</sup> T cell IFN-gamma  
919 production and differentiation of KLRG1<sup>+</sup> effector subpopulations during *Toxoplasma*  
920 *gondii* Infection. *J Immunol* 180:5935-45.
- 921 63. Suzuki Y, Remington JS. 1988. Dual regulation of resistance against *Toxoplasma gondii*  
922 infection by Lyt-2<sup>+</sup> and Lyt-1<sup>+</sup>, L3T4<sup>+</sup> T cells in mice. *J Immunol* 140:3943-6.
- 923 64. Splitt SD, Souza SP, Valentine KM, Castellanos BE, Curd AB, Hoyer KK, Jensen KDC.  
924 2018. PD-L1, TIM-3, and CTLA-4 blockade fail to promote resistance to secondary  
925 infection with virulent strains of *Toxoplasma gondii*. *Infect Immun*  
926 doi:10.1128/IAI.00459-18.

- 927 65. Sun JC, Madera S, Bezman NA, Beilke JN, Kaplan MH, Lanier LL. 2012.  
928 Proinflammatory cytokine signaling required for the generation of natural killer cell  
929 memory. *J Exp Med* 209:947-54.
- 930 66. Liu LL, Landskron J, Ask EH, Enqvist M, Sohlberg E, Traherne JA, Hammer Q,  
931 Goodridge JP, Larsson S, Jayaraman J, Oei VYS, Schaffer M, Tasken K, Ljunggren HG,  
932 Romagnani C, Trowsdale J, Malmberg KJ, Beziat V. 2016. Critical Role of CD2 Co-  
933 stimulation in Adaptive Natural Killer Cell Responses Revealed in NKG2C-Deficient  
934 Humans. *Cell Rep* 15:1088-1099.
- 935 67. Rolle A, Halenius A, Ewen EM, Cerwenka A, Hengel H, Momburg F. 2016. CD2-CD58  
936 interactions are pivotal for the activation and function of adaptive natural killer cells in  
937 human cytomegalovirus infection. *Eur J Immunol* 46:2420-2425.
- 938 68. Hunter CA, Ellis-Neyer L, Gabriel KE, Kennedy MK, Grabstein KH, Linsley PS,  
939 Remington JS. 1997. The role of the CD28/B7 interaction in the regulation of NK cell  
940 responses during infection with *Toxoplasma gondii*. *J Immunol* 158:2285-93.
- 941 69. Kim N, Kim HS. 2018. Targeting Checkpoint Receptors and Molecules for Therapeutic  
942 Modulation of Natural Killer Cells. *Front Immunol* 9:2041.
- 943 70. Madera S, Rapp M, Firth MA, Beilke JN, Lanier LL, Sun JC. 2016. Type I IFN promotes  
944 NK cell expansion during viral infection by protecting NK cells against fratricide. *J Exp*  
945 *Med* 213:225-33.
- 946 71. Villegas EN, Elloso MM, Reichmann G, Peach R, Hunter CA. 1999. Role of CD28 in the  
947 generation of effector and memory responses required for resistance to *Toxoplasma*  
948 *gondii*. *J Immunol* 163:3344-53.
- 949 72. Schulthess J, Meresse B, Ramiro-Puig E, Montcuquet N, Darche S, Begue B, Ruemmele  
950 F, Combadiere C, Di Santo JP, Buzoni-Gatel D, Cerf-Bensussan N. 2012. Interleukin-15-  
951 dependent NKp46+ innate lymphoid cells control intestinal inflammation by recruiting  
952 inflammatory monocytes. *Immunity* 37:108-21.
- 953 73. Pierog PL, Zhao Y, Singh S, Dai J, Yap GS, Fitzgerald-Bocarsly P. 2018. *Toxoplasma*  
954 *gondii* Inactivates Human Plasmacytoid Dendritic Cells by Functional Mimicry of IL-10.  
955 *J Immunol* 200:186-195.
- 956 74. Scharon-Kersten TM, Yap G, Magram J, Sher A. 1997. Inducible nitric oxide is essential  
957 for host control of persistent but not acute infection with the intracellular pathogen  
958 *Toxoplasma gondii*. *J Exp Med* 185:1261-73.
- 959 75. Yap G, Pesin M, Sher A. 2000. Cutting edge: IL-12 is required for the maintenance of  
960 IFN-gamma production in T cells mediating chronic resistance to the intracellular  
961 pathogen, *Toxoplasma gondii*. *J Immunol* 165:628-31.
- 962 76. Khan IA, Matsuura T, Kasper LH. 1994. Interleukin-12 enhances murine survival against  
963 acute toxoplasmosis. *Infect Immun* 62:1639-42.
- 964 77. Oppmann B, Lesley R, Blom B, Timans JC, Xu Y, Hunte B, Vega F, Yu N, Wang J,  
965 Singh K, Zonin F, Vaisberg E, Churakova T, Liu M, Gorman D, Wagner J, Zurawski S,  
966 Liu Y, Abrams JS, Moore KW, Rennick D, de Waal-Malefyt R, Hannum C, Bazan JF,  
967 Kastelein RA. 2000. Novel p19 protein engages IL-12p40 to form a cytokine, IL-23, with  
968 biological activities similar as well as distinct from IL-12. *Immunity* 13:715-25.
- 969 78. van de Wetering D, de Paus RA, van Dissel JT, van de Vosse E. 2009. IL-23 modulates  
970 CD56+/CD3- NK cell and CD56+/CD3+ NK-like T cell function differentially from IL-  
971 12. *Int Immunol* 21:145-53.

- 972 79. Ziblat A, Nunez SY, Raffo Iraolagoitia XL, Spallanzani RG, Torres NI, Sierra JM,  
973 Secchiari F, Domaica CI, Fuertes MB, Zwirner NW. 2017. Interleukin (IL)-23 Stimulates  
974 IFN-gamma Secretion by CD56(bright) Natural Killer Cells and Enhances IL-18-Driven  
975 Dendritic Cells Activation. *Front Immunol* 8:1959.  
976

Figure 1

A

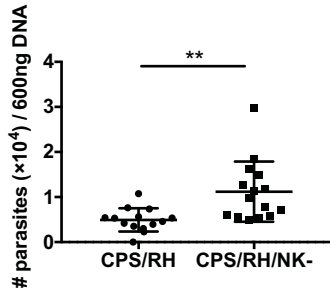

B

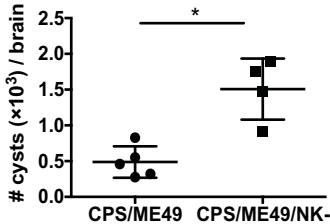

Figure 2

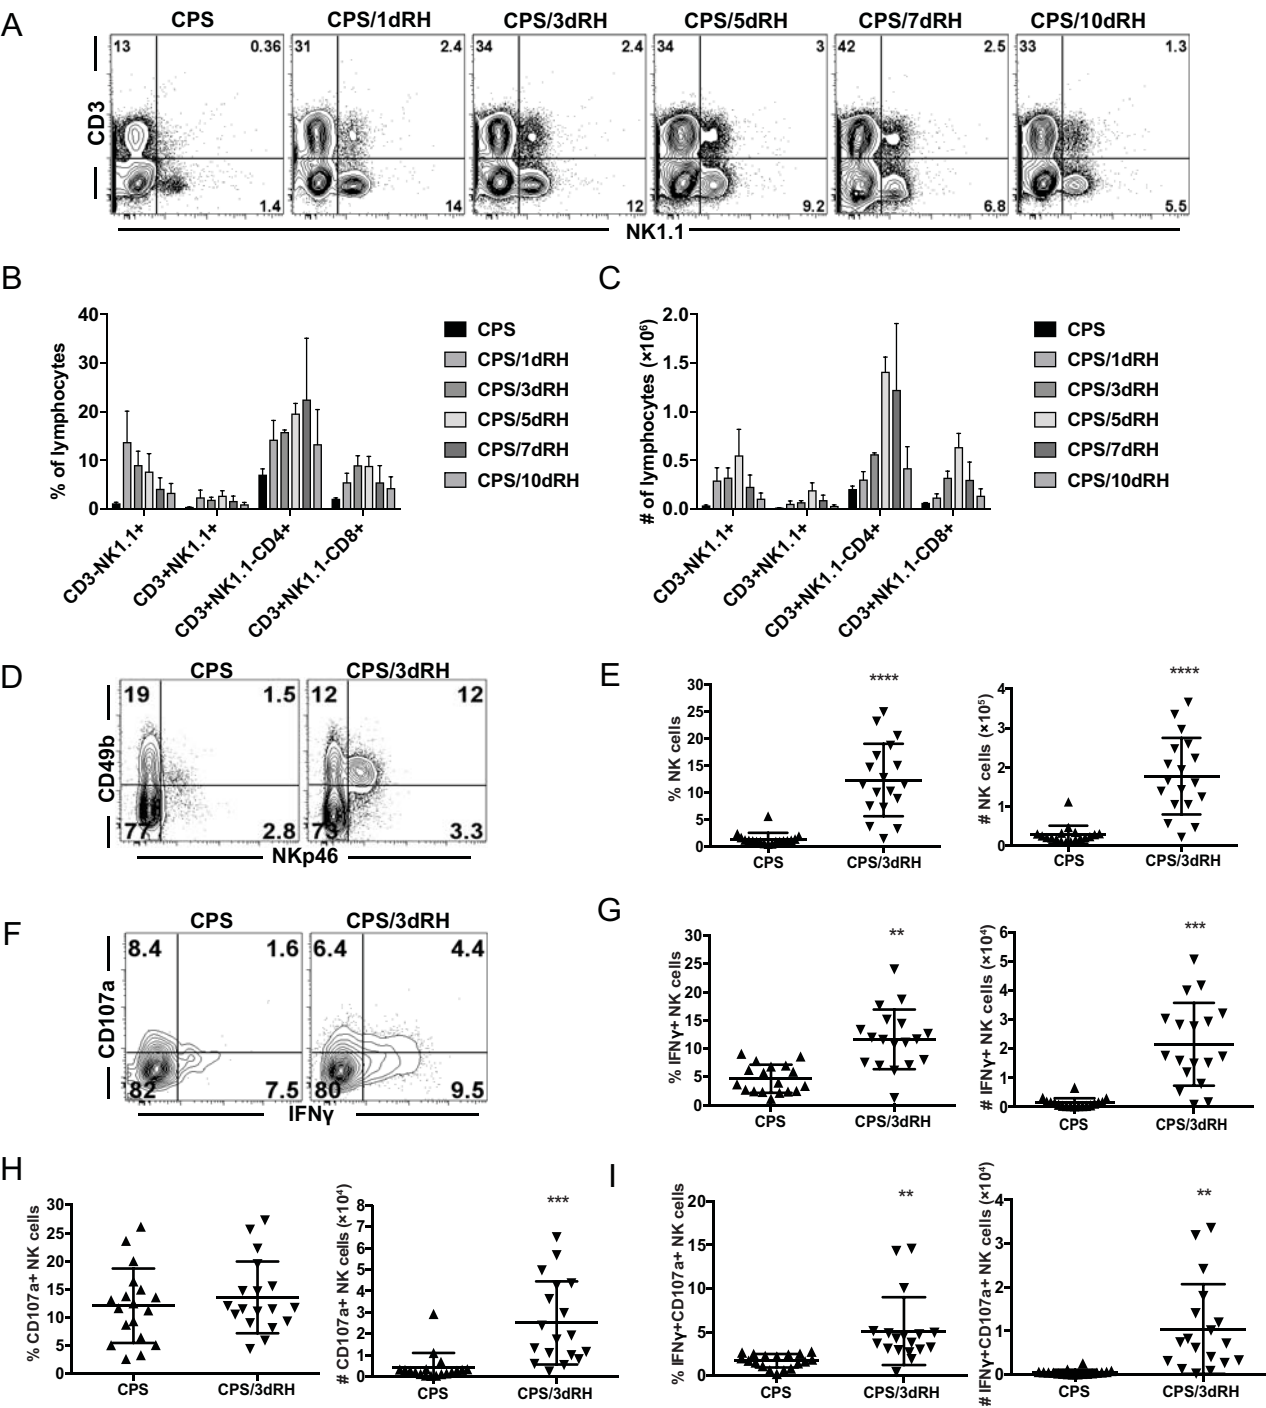

Figure 3

A

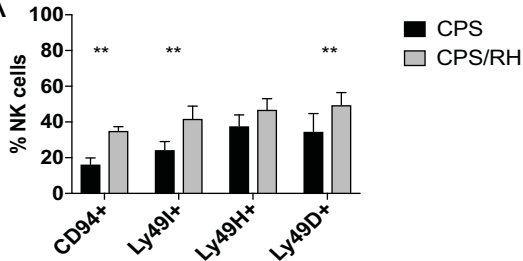

B

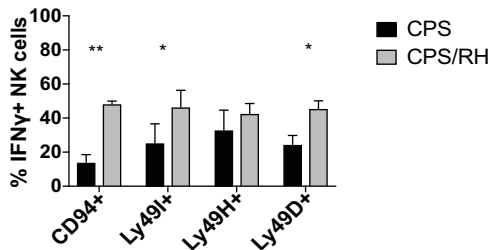

C

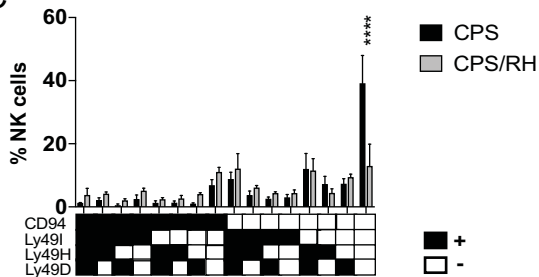

D

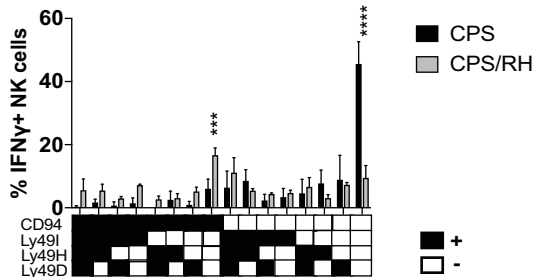

Figure 4

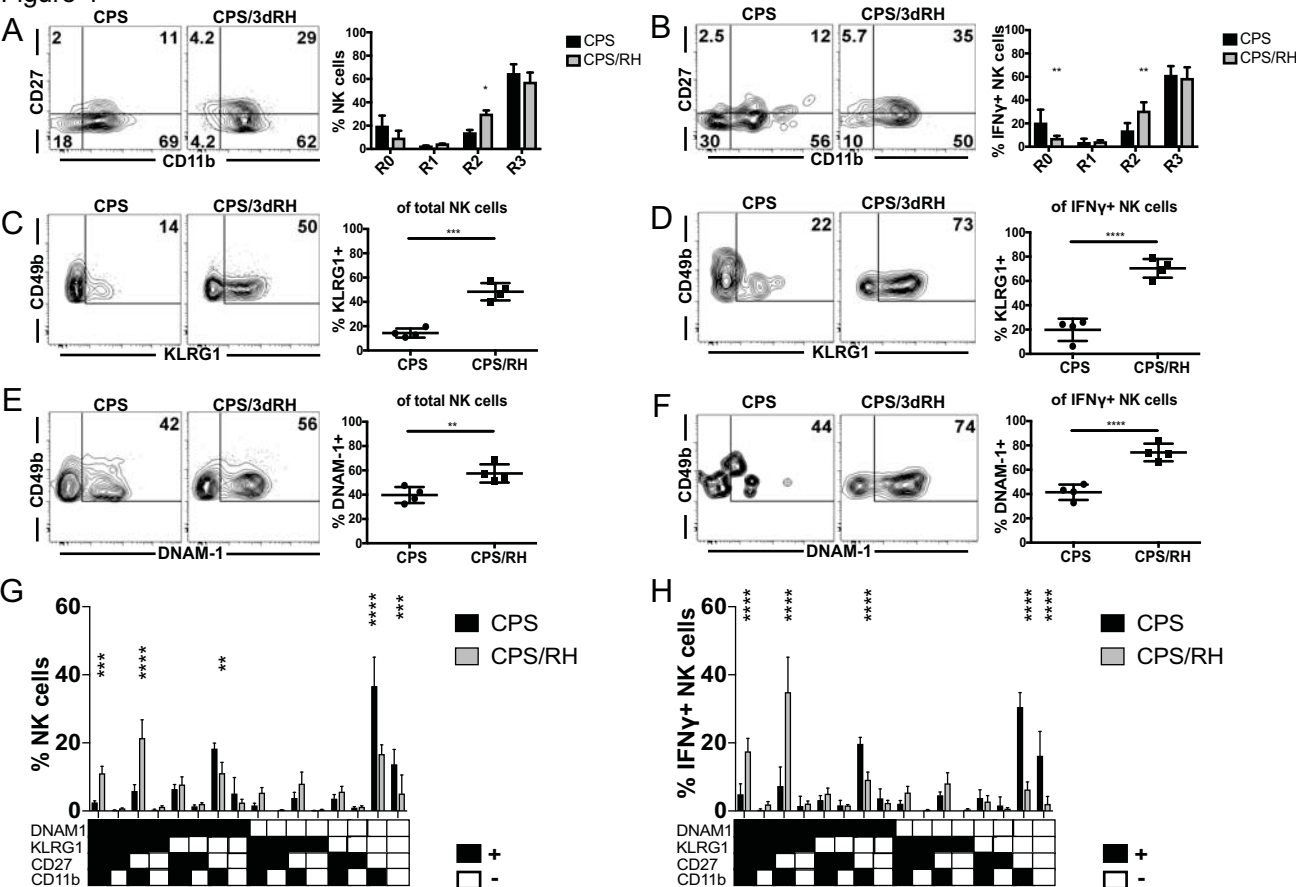

Figure 5

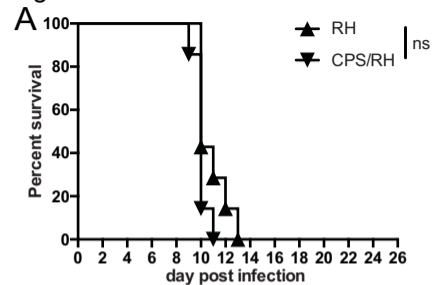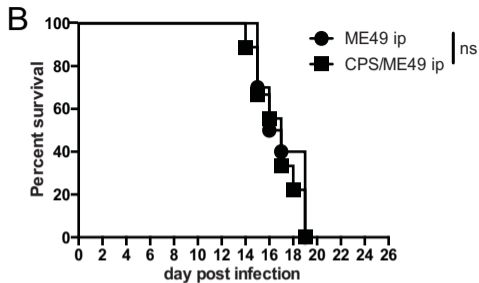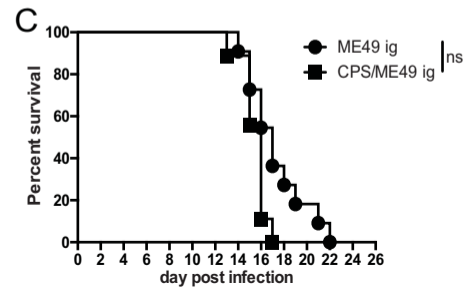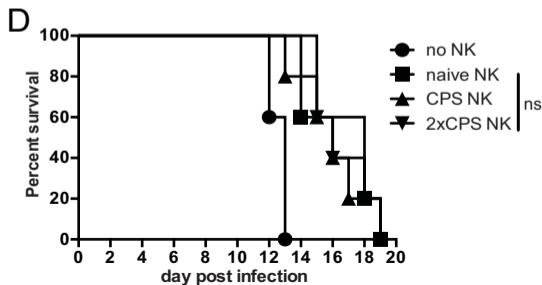



Figure 6.

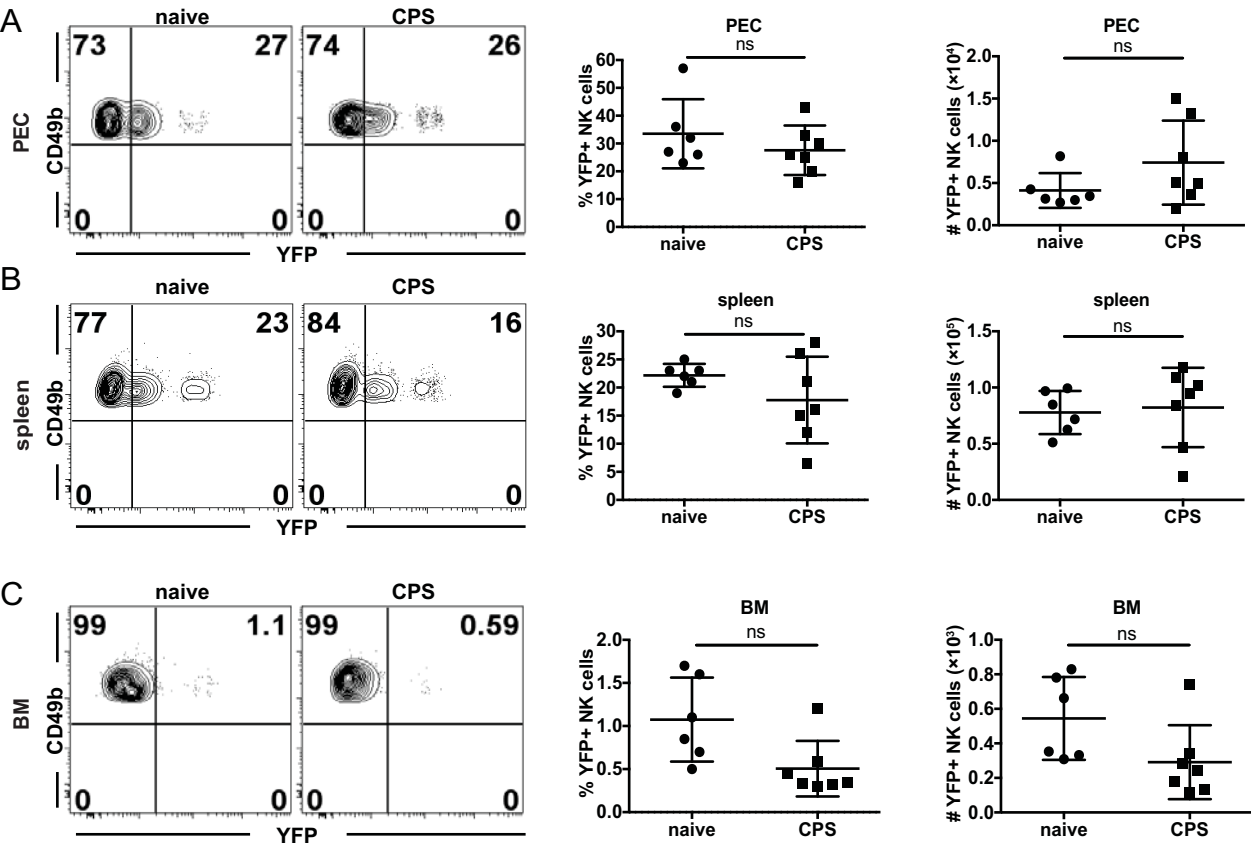

Figure 7

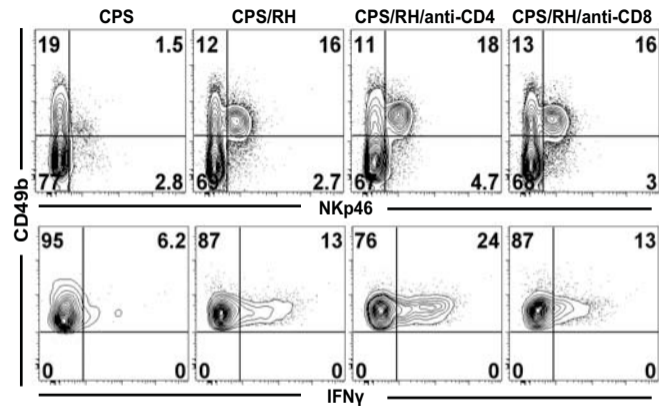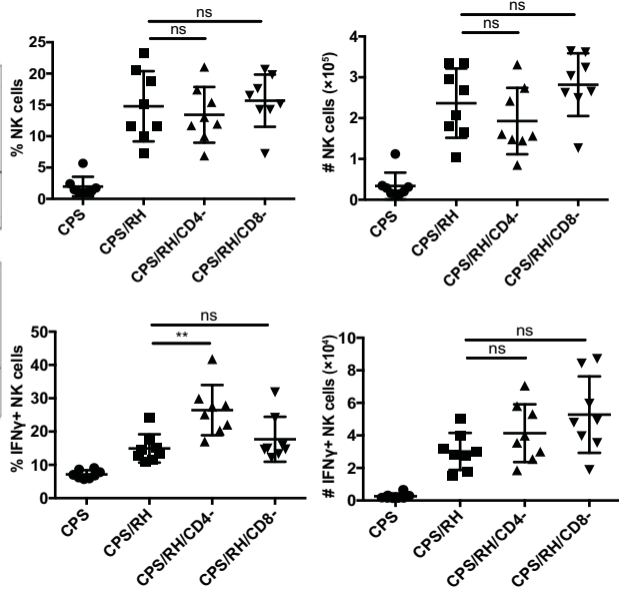

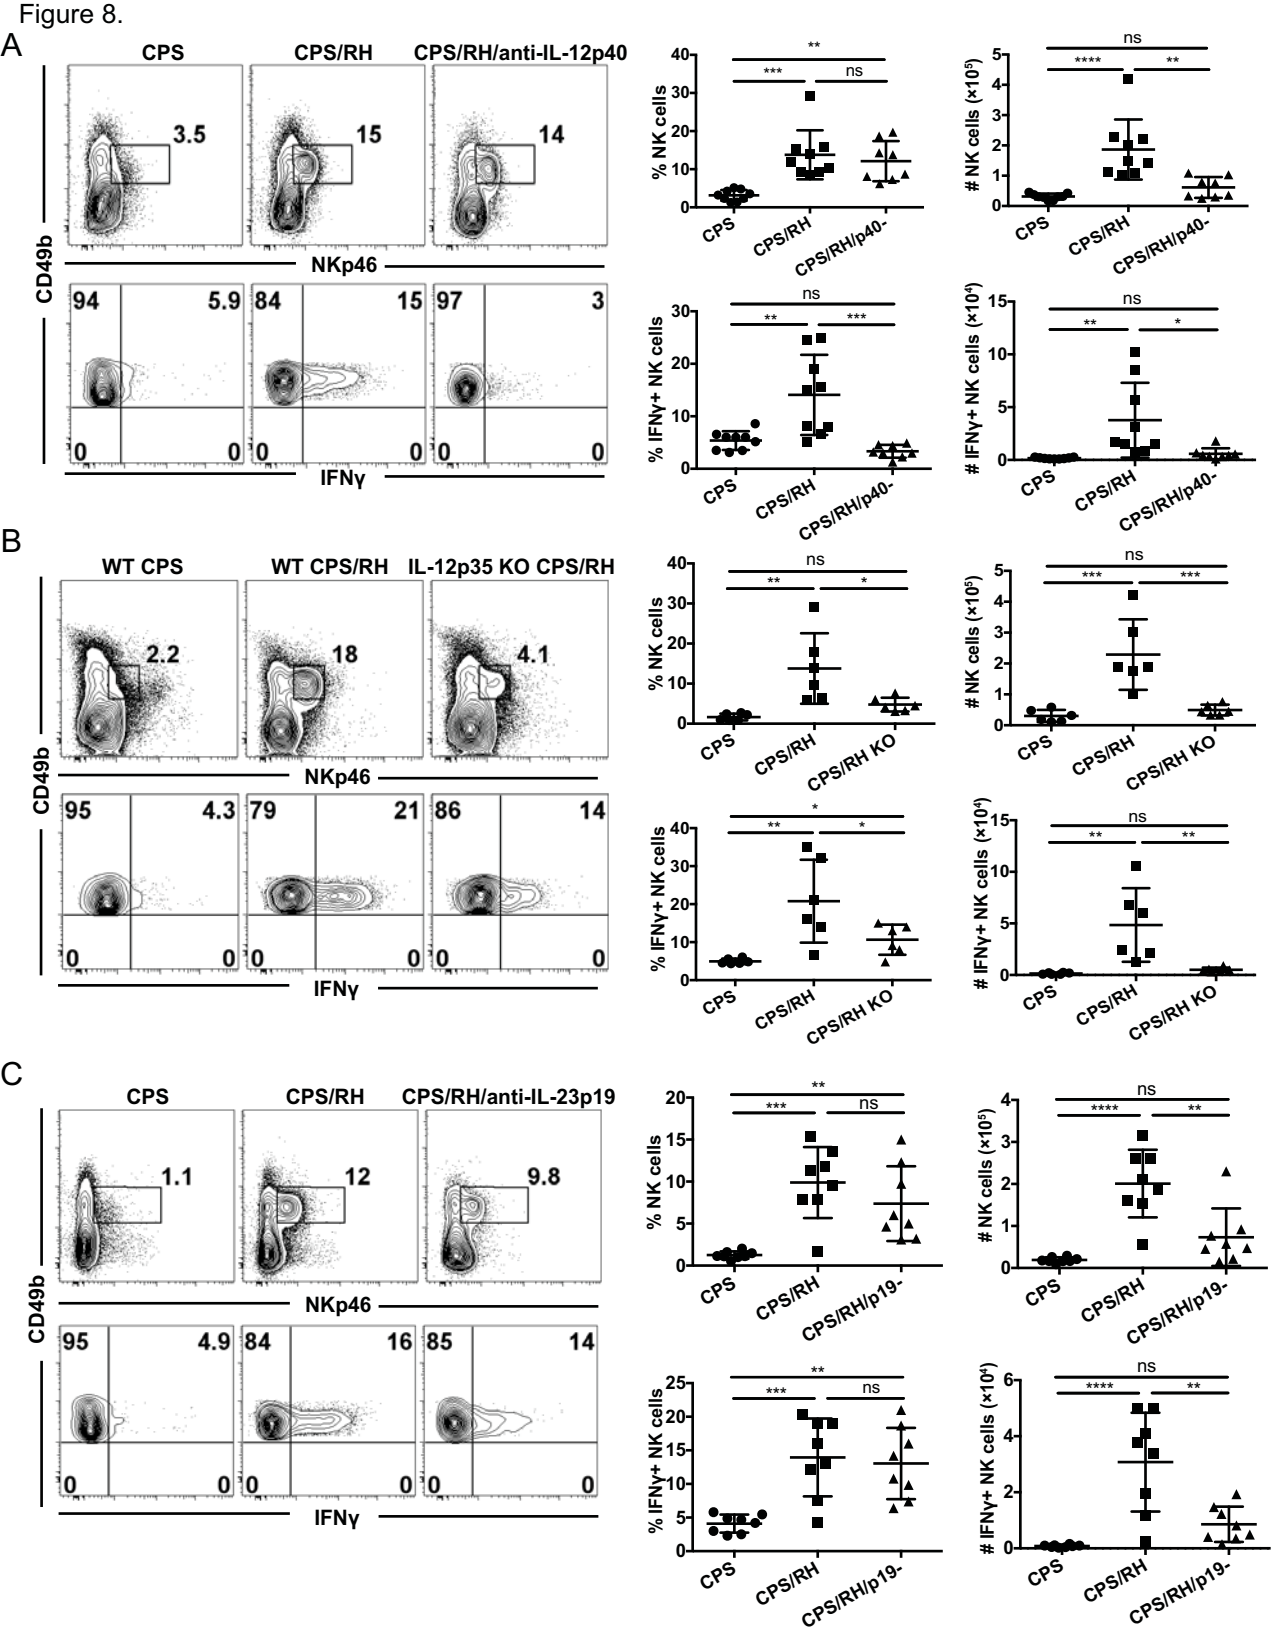

Figure 9.

A

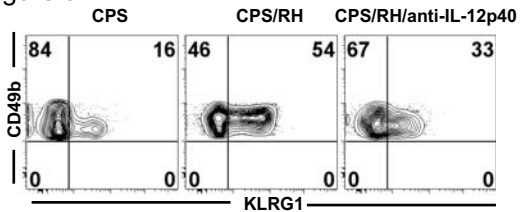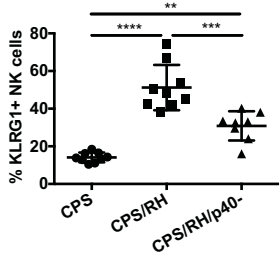

B

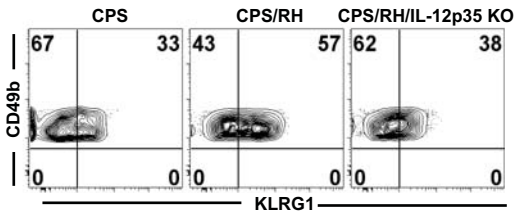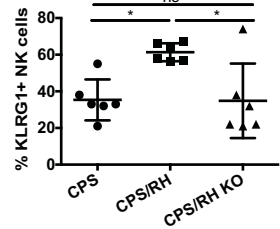

C

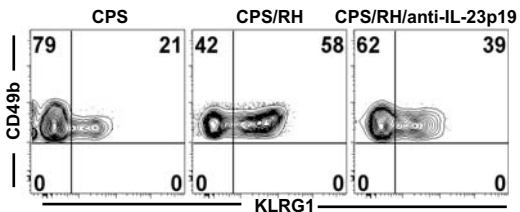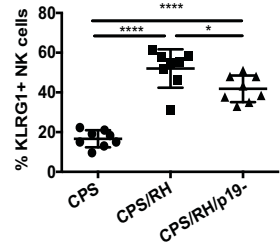

Source: https://www.biorxiv.org/content/10.1101/547455v1.full.pdf
